# Supplementary material for: Aroma Identification and Classification in 18 Kinds of Teas (Camellia sinensis) by Sensory Evaluation, HS-SPME-GC-IMS/GC × GC-MS, and Chemometrics
Source: MDPI journal article supplement (doi:10.3390/foods12132433), 2023-06-21
Supplement: s1 [file s1]

**Table S1. The result of the aroma profile evaluation**

| tea samples | Score of each aroma attribute |       |        |        |         |                 |        |         |
|-------------|-------------------------------|-------|--------|--------|---------|-----------------|--------|---------|
|             | chestnut-like                 | fresh | floral | fruity | sweetly | fermented aroma | roasty | burning |
| NO.1        | 8                             | 9     | 6      | 3      | 2       | 0               | 1      | 0       |
| NO.2        | 5                             | 9     | 8      | 3      | 1       | 0               | 2      | 0       |
| NO.3        | 3                             | 9     | 3      | 0      | 0       | 0               | 1      | 0       |
| NO.4        | 6                             | 9     | 5      | 2      | 0       | 0               | 3      | 0       |
| NO.5        | 3                             | 9     | 4      | 0      | 0       | 0               | 1      | 0       |
| NO.6        | 5                             | 9     | 6      | 1      | 0       | 0               | 2      | 0       |
| NO.7        | 7                             | 8     | 7      | 1      | 2       | 0               | 5      | 0       |
| NO.8        | 5                             | 9     | 5      | 1      | 1       | 0               | 4      | 0       |
| NO.9        | 3                             | 9     | 6      | 0      | 0       | 0               | 2      | 0       |
| NO.10       | 1                             | 5     | 9      | 9      | 7       | 4               | 8      | 0       |
| NO.11       | 1                             | 6     | 9      | 7      | 6       | 3               | 6      | 0       |
| NO.12       | 1                             | 8     | 9      | 6      | 5       | 3               | 5      | 0       |
| NO.13       | 1                             | 8     | 9      | 6      | 6       | 3               | 7      | 0       |
| NO.14       | 1                             | 5     | 9      | 8      | 7       | 4               | 8      | 0       |
| NO.15       | 0                             | 3     | 7      | 7      | 9       | 5               | 5      | 0       |
| NO.16       | 0                             | 3     | 8      | 7      | 9       | 4               | 5      | 0       |
| NO.17       | 0                             | 1     | 8      | 6      | 9       | 6               | 6      | 0       |
| NO.18       | 0                             | 0     | 3      | 5      | 8       | 5               | 7      | 8       |

**Table S2. the qualitative results of 18 kinds of teas by HS-GC-IMS**

| Count | Compounds <sup>1</sup>  | Formula | MW    | RI <sup>2</sup> | Rt [sec] <sup>3</sup> | Dt [RIPrel] <sup>4</sup> |
|-------|-------------------------|---------|-------|-----------------|-----------------------|--------------------------|
| 1     | propionaldehyde         | C3H6O   | 58.1  | 815             | 244.408               | 1.1459                   |
| 2     | acetone                 | C3H6O   | 58.1  | 836             | 253.842               | 1.1168                   |
| 3     | acrolein                | C3H4O   | 56.1  | 872             | 271.695               | 1.062                    |
| 4     | ethyl acetate           | C4H8O2  | 88.1  | 902             | 288.81                | 1.3394                   |
| 5     | 2,5-dimethylfuran       | C6H8O   | 96.1  | 911             | 294.418               | 1.0274                   |
| 6     | 2-butanone              | C4H8O   | 72.1  | 916             | 297.569               | 1.2471                   |
| 7     | 3-methylbutanal         | C5H10O  | 86.1  | 930             | 307.349               | 1.402                    |
| 8     | ethanol                 | C2H6O   | 46.1  | 946             | 318.006               | 1.0415                   |
| 9     | 2-ethylfuran            | C6H8O   | 96.1  | 962             | 330.116               | 1.0469                   |
| 10    | 2,3-butanedione         | C4H6O2  | 86.1  | 974             | 340.028               | 1.165                    |
| 11    | pentanal                | C5H10O  | 86.1  | 992             | 354.88                | 1.4258                   |
| 12    | ethyl acrylate          | C5H8O2  | 100.1 | 1017            | 377.782               | 1.1265                   |
| 13    | 2,3-pentanedione        | C5H8O2  | 100.1 | 1018            | 379.62                | 1.2238                   |
| 14    | ethyl 2-methylbutanoate | C7H14O2 | 130.2 | 1019            | 380.585               | 1.2333                   |
| 15    | ethyl 3-methylbutanoate | C7H14O2 | 130.2 | 1023            | 383.726               | 1.2567                   |
| 16    | propyl acetate M        | C5H10O2 | 102.1 | 1025            | 386.176               | 1.1654                   |
| 17    | propyl acetate D        | C5H10O2 | 102.1 | 1026            | 387.166               | 1.4781                   |
| 18    | ethyl propanoate        | C5H10O2 | 102.1 | 1027            | 387.763               | 1.145                    |
| 19    | $\alpha$ -pinene        | C10H16  | 136.2 | 1027            | 388.409               | 1.2163                   |
| 20    | 1-propanol              | C3H8O   | 60.1  | 1040            | 401.381               | 1.1083                   |
| 21    | ethyl butanoate M       | C6H12O2 | 116.2 | 1048            | 409.833               | 1.2061                   |
| 22    | ethyl butanoate D       | C6H12O2 | 116.2 | 1047            | 409.264               | 1.5602                   |
| 23    | hexanal                 | C6H12O  | 100.2 | 1093            | 463.902               | 1.5647                   |

|    |                       |          |       |      |          |        |
|----|-----------------------|----------|-------|------|----------|--------|
| 24 | 2-methylpropanol      | C4H10O   | 74.1  | 1102 | 475.837  | 1.1674 |
| 25 | β-pinene              | C10H16   | 136.2 | 1111 | 488.409  | 1.2191 |
| 26 | butyl propionate      | C7H14O2  | 130.2 | 1134 | 523.595  | 1.2806 |
| 27 | butanol M             | C4H10O   | 74.1  | 1157 | 559.819  | 1.1835 |
| 28 | butanol D             | C4H10O   | 74.1  | 1157 | 560.347  | 1.3788 |
| 29 | 2-methylbutanol       | C5H12O   | 88.1  | 1170 | 584.007  | 1.2328 |
| 30 | pentyl acetate        | C7H14O2  | 130.2 | 1188 | 617.101  | 1.3121 |
| 31 | ethyl valerate        | C7H14O2  | 130.2 | 1192 | 623.905  | 1.2635 |
| 32 | 2-heptanone           | C7H14O   | 114.2 | 1197 | 633.374  | 1.6304 |
| 33 | heptanal              | C7H14O   | 114.2 | 1204 | 648.026  | 1.3284 |
| 34 | limonene M            | C10H16   | 136.2 | 1208 | 657.706  | 1.2196 |
| 35 | limonene D            | C10H16   | 136.2 | 1209 | 658.563  | 1.291  |
| 36 | limonene T            | C10H16   | 136.2 | 1208 | 657.283  | 1.656  |
| 37 | 3-methylbutanol M     | C5H12O   | 88.1  | 1223 | 688.846  | 1.243  |
| 38 | 3-methylbutanol D     | C5H12O   | 88.1  | 1222 | 687.023  | 1.4888 |
| 39 | o-xylene              | C8H10    | 106.2 | 1226 | 694.721  | 1.0662 |
| 40 | ethyl caproate        | C8H16O2  | 144.2 | 1233 | 712.352  | 1.3403 |
| 41 | 2-pentylfuran         | C9H14O   | 138.2 | 1246 | 742.491  | 1.2526 |
| 42 | 2-hexanol             | C6H14O   | 102.2 | 1248 | 746.443  | 1.2807 |
| 43 | cyclohexanone         | C6H10O   | 98.1  | 1259 | 774.362  | 1.1493 |
| 44 | beta-ocimene          | C10H16   | 136.2 | 1262 | 783.593  | 1.2147 |
| 45 | 1-pentanol M          | C5H12O   | 88.1  | 1266 | 793.463  | 1.2526 |
| 46 | 1-pentanol D          | C5H12O   | 88.1  | 1267 | 794.98   | 1.5089 |
| 47 | (Z)-3-hexenyl acetate | C8H14O2  | 142.2 | 1268 | 799.496  | 1.3039 |
| 48 | 2-methylpyrazine M    | C5H6N2   | 94.1  | 1279 | 827.85   | 1.073  |
| 49 | 2-methylpyrazine D    | C5H6N2   | 94.1  | 1279 | 827.75   | 1.0882 |
| 50 | 2-octanone            | C8H16O   | 128.2 | 1297 | 880.987  | 1.3343 |
| 51 | octanal M             | C8H16O   | 128.2 | 1301 | 891.341  | 1.3998 |
| 52 | octanal D             | C8H16O   | 128.2 | 1300 | 889.701  | 1.8242 |
| 53 | 1-hydroxy-2-propanone | C3H6O2   | 74.1  | 1306 | 906.463  | 1.0421 |
| 54 | (E)-3-hexenol         | C6H12O   | 100.2 | 1311 | 923.089  | 1.2369 |
| 55 | 3-methylpentanol      | C6H14O   | 102.2 | 1318 | 947.643  | 1.3111 |
| 56 | 2,5-dimethylpyrazine  | C6H8N2   | 108.1 | 1327 | 975.184  | 1.1139 |
| 57 | (E)-2-heptenal        | C7H12O   | 112.2 | 1332 | 992.725  | 1.2568 |
| 58 | methyl heptenone      | C8H14O   | 126.2 | 1347 | 1046.964 | 1.1772 |
| 59 | dimethyl trisulfide   | C2H6S3   | 126.3 | 1357 | 1081.685 | 1.3042 |
| 60 | 1-hexanol M           | C6H14O   | 102.2 | 1367 | 1122.538 | 1.3221 |
| 61 | 1-hexanol D           | C6H14O   | 102.2 | 1366 | 1117.489 | 1.6379 |
| 62 | ethyl lactate         | C5H10O3  | 118.1 | 1381 | 1179.318 | 1.1433 |
| 63 | (Z)-3-hexenol M       | C6H12O   | 100.2 | 1393 | 1233.068 | 1.2291 |
| 64 | (Z)-3-hexenol D       | C6H12O   | 100.2 | 1394 | 1234.446 | 1.5094 |
| 65 | nonanal               | C9H18O   | 142.2 | 1398 | 1251.23  | 1.4721 |
| 66 | 2-cyclohexenone       | C6H8O    | 96.1  | 1404 | 1279.452 | 1.1149 |
| 67 | 2-butoxyethanol       | C6H14O2  | 118.2 | 1407 | 1295.776 | 1.2919 |
| 68 | (E)-2-octenal         | C8H14O   | 126.2 | 1427 | 1392.429 | 1.3346 |
| 69 | trimethylpyrazine     | C7H10N2  | 122.2 | 1433 | 1421.013 | 1.1679 |
| 70 | acetic acid           | C2H4O2   | 60.1  | 1454 | 1532.292 | 1.0509 |
| 71 | 1-octen-3-ol          | C8H16O   | 128.2 | 1464 | 1585.289 | 1.1626 |
| 72 | diallyl disulfide M   | C6H10S2  | 146.3 | 1465 | 1592.656 | 1.1991 |
| 73 | diallyl disulfide D   | C6H10S2  | 146.3 | 1466 | 1596.792 | 1.632  |
| 74 | ethyl octanoate       | C10H20O2 | 172.3 | 1467 | 1601.005 | 1.4761 |

|    |                         |                                                |       |      |          |        |
|----|-------------------------|------------------------------------------------|-------|------|----------|--------|
| 75 | furfural M              | C <sub>5</sub> H <sub>4</sub> O <sub>2</sub>   | 96.1  | 1468 | 1609.8   | 1.0837 |
| 76 | furfural D              | C <sub>5</sub> H <sub>4</sub> O <sub>2</sub>   | 96.1  | 1468 | 1607.942 | 1.3346 |
| 77 | (E,E)-2,4-heptadienal M | C <sub>7</sub> H <sub>10</sub> O               | 110.2 | 1487 | 1721.241 | 1.1879 |
| 78 | (E,E)-2,4-heptadienal D | C <sub>7</sub> H <sub>10</sub> O               | 110.2 | 1487 | 1720.072 | 1.6209 |
| 79 | 2-acetylfuran           | C <sub>6</sub> H <sub>6</sub> O <sub>2</sub>   | 110.1 | 1502 | 1815.286 | 1.1147 |
| 80 | (E)-2-nonenal           | C <sub>9</sub> H <sub>16</sub> O               | 140.2 | 1502 | 1818.222 | 1.4072 |
| 81 | benzaldehyde M          | C <sub>7</sub> H <sub>6</sub> O                | 106.1 | 1508 | 1858.176 | 1.1509 |
| 82 | benzaldehyde D          | C <sub>7</sub> H <sub>6</sub> O                | 106.1 | 1509 | 1859.845 | 1.4716 |
| 83 | bornyl acetate          | C <sub>12</sub> H <sub>20</sub> O <sub>2</sub> | 196.3 | 1565 | 2276.104 | 1.2187 |
| 84 | 5-methylfurfural        | C <sub>6</sub> H <sub>6</sub> O <sub>2</sub>   | 110.1 | 1568 | 2302.57  | 1.1253 |
| 85 | methyl benzoate         | C <sub>8</sub> H <sub>8</sub> O <sub>2</sub>   | 136.1 | 1575 | 2357.601 | 1.2025 |

<sup>1</sup>. The volatile compounds detected in all 18 kinds of teas by GC-IMS. The signal M represented monomer, the signal D represented dimer, and the T represented Trimer.

<sup>2</sup>. RI, retention index.

<sup>3</sup>. RT, retention time.

<sup>4</sup>. DT, relative migration time.

| no. | RI   | aorma compounds       | identificati<br>on<br>methods | perception                                                        | peak areas of tea samples |        |             |             |             |             |              |             |             |             |             |             |             |             |         |              |             |              |
|-----|------|-----------------------|-------------------------------|-------------------------------------------------------------------|---------------------------|--------|-------------|-------------|-------------|-------------|--------------|-------------|-------------|-------------|-------------|-------------|-------------|-------------|---------|--------------|-------------|--------------|
|     |      |                       |                               |                                                                   | NO.1                      | NO.2   | NO.3        | NO.4        | NO.5        | NO.6        | NO.7         | NO.8        | NO.9        | NO.10       | NO.11       | NO.12       | NO.13       | NO.14       | NO.15   | NO.16        | NO.17       | NO.18        |
| 1   | 813  | 2-methylpropanal      | MS/RI/S                       | herbal green                                                      | 1591.9<br>4               | 0.00   | 3.22        | 275.3<br>6  | 105.92      | 495.28      | 2064.9<br>9  | 186.9<br>4  | 838.85      | 0.00        | 850.65      | 129.05      | 1005.2<br>2 | 1204.5<br>6 | 1750.82 | 2866.9<br>3  | 745.62      | 1765.12      |
| 2   | 814  | acetone               | MS/RI                         | solvent 、<br>fruit                                                | 252.21                    | 103.02 | 293.89      | 17.18       | 81.79       | 47.77       | 777.72       | 79.11       | 325.30      | 340.62      | 113.16      | 31.49       | 0.00        | 228.36      | 41.68   | 63.24        | 0.00        | 273.10       |
| 3   | 832  | 3-methylfuran         | MS/RI                         | chocolate                                                         | 0.00                      | 0.00   | 959.66      | 107.3<br>8  | 73.10       | 13.65       | 0.00         | 133.6<br>0  | 369.92      | 0.00        | 228.48      | 155.61      | 180.22      | 0.00        | 0.00    | 959.06       | 0.00        | 566.59       |
| 4   | 864  | methyl acetate        | MS/RI                         | green,<br>etherial,<br>fruity, fresh,<br>rum and<br>whiskey-like  | 944.46                    | 0.00   | 154.64      | 0.00        | 0.00        | 1.10        | 708.94       | 0.00        | 252.73      | 1805.2<br>9 | 337.70      | 0.00        | 454.80      | 2152.7<br>5 | 0.00    | 443.47       | 194.35      | 305.98       |
| 5   | 876  | 2-methylfuran         | MS/RI                         | chocolate                                                         | 630.31                    | 0.00   | 945.36      | 505.6<br>5  | 449.45      | 540.32      | 1306.3<br>5  | 436.9<br>8  | 247.98      | 1560.5<br>2 | 1730.5<br>1 | 401.71      | 1520.1<br>5 | 2822.3<br>3 | 55.64   | 60.22        | 104.10      | 1375.48      |
| 6   | 907  | ethyl acetate         | MS/RI/S/O                     | sweet waxy<br>floral                                              | 2124.6<br>3               | 0.00   | 749.95      | 533.3<br>4  | 462.50      | 873.25      | 804.07       | 326.9<br>1  | 638.93      | 9543.8<br>4 | 173.31      | 316.66      | 241.90      | 0.00        | 764.25  | 0.00         | 264.71      | 208.23       |
| 7   | 910  | 3-methylbutanal       | MS/RI/S/O                     | fruity nutty<br>cocoa                                             | 0.00                      | 138.27 | 0.00        | 1082.<br>47 | 2357.2<br>8 | 10.22       | 871.49       | 90.34       | 3174.0<br>0 | 0.00        | 2161.9<br>1 | 658.87      | 6088.0<br>7 | 72.69       | 7931.99 | 8120.7<br>9  | 5214.5<br>8 | 0.00         |
| 8   | 912  | 2-methylbutanal       | MS/RI/S/O                     | cocoa,<br>almond                                                  | 9147.8<br>4               | 0.00   | 1138.1<br>9 | 1335.<br>77 | 0.00        | 3628.0<br>3 | 14034.<br>04 | 6232.<br>86 | 3715.5<br>4 | 4033.5<br>5 | 2224.0<br>8 | 0.00        | 0.00        | 8507.9<br>1 | 7125.03 | 10995.<br>98 | 3708.8<br>7 | 13765.7<br>6 |
| 9   | 935  | pentanal              | MS/RI/S/O                     | nutty 、cocoa                                                      | 4188.3<br>8               | 792.40 | 3156.8<br>0 | 3137.<br>76 | 6437.3<br>0 | 4805.6<br>1 | 8300.6<br>1  | 9177.<br>41 | 9755.6<br>7 | 2667.5<br>0 | 5947.3<br>3 | 5098.1<br>9 | 9433.9<br>2 | 4258.4<br>4 | 1237.99 | 4601.3<br>3  | 3990.4<br>8 | 5506.36      |
| 10  | 955  | 2-ethylfuran          | MS/RI                         | solvent<br>ethereal<br>brown cocoa<br>beany rooty<br>earthy musty | 808.85                    | 0.00   | 1568.9<br>4 | 1443.<br>63 | 316.89      | 1188.2<br>8 | 1664.5<br>3  | 286.0<br>9  | 868.00      | 3433.3<br>3 | 1496.2<br>2 | 532.34      | 2076.6<br>4 | 5361.7<br>2 | 767.39  | 3451.1<br>0  | 2112.6<br>2 | 5859.01      |
| 11  | 973  | 1-penten-3-one        | MS/RI/S/O                     | fish, pungent                                                     | 520.29                    | 62.40  | 8077.0<br>5 | 376.7<br>4  | 249.83      | 295.19      | 989.61       | 436.0<br>0  | 324.06      | 2049.0<br>4 | 4287.9<br>0 | 3843.3<br>4 | 5690.7<br>7 | 3061.8<br>7 | 528.85  | 965.31       | 2110.0<br>8 | 1229.99      |
| 12  | 998  | 2,3-butanedione       | MS/RI/S/O                     | creamy<br>buttery                                                 | 0.00                      | 0.00   | 0.00        | 83.38       | 86.05       | 14.09       | 303.72       | 76.67       | 0.00        | 80.57       | 7.67        | 0.00        | 298.04      | 209.74      | 113.61  | 0.00         | 3.42        | 0.00         |
| 13  | 1000 | amylene hydrate       | MS/RI                         | pungent                                                           | 0.00                      | 66.74  | 0.00        | 0.00        | 0.00        | 43.29       | 0.00         | 0.00        | 25.00       | 103.29      | 0.00        | 0.00        | 0.00        | 409.50      | 27.80   | 235.52       | 148.81      | 202.52       |
| 14  | 1008 | 2-methyl-3-buten-2-ol | MS/RI/S                       | herbal earthy<br>oily                                             | 0.00                      | 0.00   | 36.75       | 29.04       | 0.00        | 0.00        | 0.00         | 0.00        | 0.00        | 0.00        | 0.00        | 15.63       | 0.00        | 0.00        | 0.00    | 9.87         | 15.92       | 34.89        |
| 15  | 1042 | toluene               | MS/RI/S                       | sweet                                                             | 4579.9<br>3               | 1618.4 |             |             |             |             |              |             |             |             |             |             |             |             |         |              |             |              |

## onion bitter

|    |      |                                      |           |                                        |              |             |              |             |             |              |             |             |              |              |             |              |             |              |              |              |              |              |
|----|------|--------------------------------------|-----------|----------------------------------------|--------------|-------------|--------------|-------------|-------------|--------------|-------------|-------------|--------------|--------------|-------------|--------------|-------------|--------------|--------------|--------------|--------------|--------------|
| 22 | 1101 | 2-methyl-2-butenal                   | MS/RI/S/O | green, fruit                           | 139.55       | 0.00        | 601.12       | 77.82       | 56.40       | 64.66        | 195.13      | 41.46       | 138.28       | 1261.9<br>4  | 669.63      | 85.62        | 288.45      | 1295.1<br>1  | 670.47       | 1107.8<br>1  | 258.97       | 972.85       |
| 23 | 1131 | (E)-2-pentenal                       | MS/RI/S/O | fruit                                  | 70.19        | 251.07      | 15797.<br>86 | 1127.<br>24 | 0.00        | 854.64       | 1386.4<br>7 | 601.9<br>2  | 27.22        | 4505.3<br>7  | 4945.8<br>3 | 4725.5<br>0  | 7304.7<br>6 | 5356.2<br>9  | 917.93       | 2170.1<br>1  | 3302.5<br>1  | 5639.49      |
| 24 | 1131 | 3-heptanone                          | MS/RI/S/O | green, fatty,<br>fruity                | 2730.2<br>1  | 0.00        | 874.63       | 313.0<br>6  | 600.28      | 1598.2<br>7  | 1790.1<br>3 | 735.0<br>1  | 2426.6<br>3  | 208.62       | 112.55      | 271.86       | 306.90      | 413.74       | 2158.48      | 824.69       | 1953.8<br>9  | 216.31       |
| 25 | 1132 | propanoic acid, butyl<br>ester       | MS/RI/S/O | fruity, sweet                          | 0.00         | 0.00        | 0.00         | 55.46       | 109.19      | 0.00         | 104.69      | 87.81       | 117.10       | 0.00         | 0.00        | 0.00         | 0.00        | 59.40        | 281.44       | 0.00         | 231.73       | 0.00         |
| 26 | 1157 | 2-methyl-2-pentenal                  | MS/RI/S/O | sweet, fruity                          | 0.00         | 0.00        | 550.45       | 342.4<br>2  | 160.13      | 243.75       | 601.34      | 49.02       | 755.98       | 892.27       | 860.07      | 119.54       | 485.09      | 1066.9<br>1  | 0.00         | 1681.8<br>4  | 390.13       | 2981.97      |
| 27 | 1157 | 1-penten-3-ol                        | MS/RI/S/O | butter,<br>pungent                     | 395.08       | 29.12       | 4422.7<br>1  | 810.6<br>5  | 96.06       | 905.33       | 2127.1<br>7 | 484.8<br>7  | 986.88       | 2241.9<br>3  | 2444.0<br>8 | 2716.2<br>0  | 4063.1<br>8 | 3717.5<br>3  | 284.02       | 1387.6<br>7  | 1654.3<br>2  | 1771.76      |
| 28 | 1158 | trans-2-butenoic acid<br>ethyl ester | MS/RI/S/O | musty, onion,<br>garlic,<br>caramellic | 25.47        | 0.00        | 305.18       | 0.00        | 22.45       | 130.71       | 149.40      | 18.30       | 147.47       | 0.00         | 0.00        | 0.00         | 0.00        | 0.00         | 160.31       | 0.00         | 130.25       | 0.00         |
| 29 | 1166 | $\alpha$ -phellandrene               | MS/RI/S/O | turpentine,<br>mint, spice             | 1317.1<br>8  | 0.00        | 148.23       | 0.00        | 0.00        | 211.78       | 327.32      | 42.60       | 221.13       | 812.77       | 78.20       | 226.81       | 442.29      | 570.77       | 3.20         | 1592.2<br>7  | 0.00         | 0.00         |
| 30 | 1170 | $\beta$ -myrcene                     | MS/RI/S/O | woody, citrus                          | 6263.0<br>6  | 3389.0<br>8 | 1416.0<br>9  | 714.3<br>7  | 507.45      | 12327.<br>35 | 3592.5<br>4 | 512.4<br>8  | 15696.<br>59 | 6160.4<br>9  | 612.72      | 3147.4<br>4  | 4579.7<br>3 | 3788.2<br>4  | 17909.5<br>9 | 21053.<br>70 | 12866.<br>09 | 35690.3<br>2 |
| 31 | 1174 | heptanal                             | MS/RI/S/O | fat, citrus                            | 2424.1<br>0  | 718.55      | 8029.1<br>6  | 2588.<br>24 | 2506.4<br>6 | 4741.6<br>9  | 5322.8<br>3 | 1464.<br>02 | 3936.9<br>8  | 0.00         | 139.22      | 2984.2<br>4  | 9626.5<br>8 | 452.46       | 3063.08      | 3374.0<br>4  | 12857.<br>53 | 8657.79      |
| 32 | 1177 | methyl hexanoate                     | MS/RI/S/O | tropical<br>fruit,<br>creamy           | 0.00         | 0.00        | 0.00         | 0.00        | 0.00        | 0.00         | 239.63      | 0.00        | 175.35       | 2078.6<br>8  | 0.00        | 0.00         | 0.00        | 4453.1<br>1  | 178.69       | 1790.6<br>4  | 0.00         | 3207.41      |
| 33 | 1178 | $\alpha$ -terpinene                  | MS/RI/S   | lemon                                  | 1790.9<br>7  | 0.00        | 122.52       | 29.67       | 41.71       | 915.16       | 366.50      | 63.68       | 622.45       | 1720.3<br>4  | 94.48       | 709.65       | 411.34      | 1141.2<br>7  | 0.00         | 1366.9<br>4  | 595.25       | 1608.07      |
| 34 | 1178 | 1-ethyl-1H-pyrrole                   | MS/RI/S/O | burnt                                  | 16305.<br>14 | 0.00        | 199.40       | 1384.<br>14 | 603.16      | 382.97       | 5895.7<br>9 | 617.6<br>4  | 3255.0<br>9  | 6044.9<br>2  | 881.85      | 99.05        | 482.44      | 7189.3<br>3  | 754.98       | 516.67       | 107.57       | 353.92       |
| 35 | 1201 | (+)-limonene                         | MS/RI/S/O | citrus                                 | 9108.4<br>6  | 5843.4<br>3 | 3323.4<br>1  | 1334.<br>69 | 3008.0<br>1 | 51365.<br>27 | 9801.8<br>1 | 3332.<br>28 | 10219.<br>72 | 16160.<br>53 | 0.00        | 86821.<br>33 | 9386.9<br>6 | 15783.<br>55 | 20459.1<br>2 | 12707.<br>34 | 11880.<br>76 | 9962.56      |
| 36 | 1201 | (E)-2-hexenal                        | MS/RI/S/O | apple, green                           | 589.58       | 218.42      | 16127.<br>13 | 985.3<br>1  | 199.71      | 2800.7<br>5  | 610.93      | 258.7<br>1  | 0.00         | 6633.7<br>7  | 3016.4<br>2 | 1303.6<br>5  | 2001.1<br>8 | 7797.3<br>9  | 12577.6<br>5 | 11491.<br>75 | 20054.<br>69 | 30916.5<br>4 |
| 37 | 1206 | 3-methyl-2-butenal                   | MS/RI/S/O | sweet, fruity,<br>green                | 140.36       | 0.00        | 647.38       | 192.4<br>1  | 0.00        | 88.48        | 91.47       | 290.2<br>5  | 62.82        | 381.54       | 324.26      | 254.42       | 140.45      | 300.28       | 104.38       | 215.04       | 2126.9<br>2  | 388.49       |
| 38 | 1209 | $\beta$ -phellandrene                | MS/RI/S/O | mint,<br>terpentine                    | 1713.9<br>6  | 119.32      | 0.00         | 33.94       | 18.03       | 0.00         | 458.02      | 35.90       | 270.16       | 893.38       | 121.50      | 0.00         | 0.00        | 0.00         | 0.00         | 1722.1<br>0  | 1012.6<br>6  | 0.00         |
| 39 | 1209 | pyrazine                             | MS/RI/S   | roasted hazel<br>nut                   | 0.00         | 0.00        | 0.00         | 0.00        | 0.00        | 0.00         | 0.00        | 0.00        | 0.00         | 0.00         | 0.00        | 0.00         | 0.00        | 436.83       | 135.67       | 0.00         | 0.00         | 149.06       |
| 40 | 1213 | 1,8-cineole                          | MS/RI/S   | mint                                   | 0.00         | 0.00        | 557.25       | 76.08       | 28.78       | 202.62       | 197.20      | 70.10       | 334.47       | 0.00         | 0.00        | 0.00         | 0.00        | 0.00         | 173.89       | 117.16       | 0.00         | 0.00         |
| 41 | 1220 | ethyl hexanoate                      | MS/RI/S   | apple peel,<br>fruit                   | 0.00         | 0.00        | 348.42       | 102.8<br>9  | 174.64      | 467.47       | 846.72      | 166.0<br>4  | 971.17       | 93.09        | 27.42       | 89.01        | 157.16      | 111.24       | 802.16       | 763.39       | 933.29       | 383.97       |
| 42 | 1225 | butanoic acid, butyl ester           | MS/RI/S   | sweet, fruity,<br>fatty                | 135.88       | 0.00        | 0.00         | 78.63       | 169.56      | 147.41       | 456.99      | 189.9<br>8  | 433.30       | 0.00         | 90.88       | 0.00         | 0.00        | 0.00         | 1002.09      | 252.50       | 762.61       | 0.00         |
| 43 | 1230 | 4-heptenal                           | MS/RI/S/O | biscuit, cream                         | 931.31       | 69.21       | 12033.<br>39 | 597.1<br>8  | 164.72      | 535.82       | 1247.8<br>2 | 364.1<br>6  | 304.38       | 3576.6<br>6  | 1983.5<br>0 | 2927.1<br>1  | 5233.9<br>7 | 6062.8<br>7  | 505.55       | 1172.3<br>7  | 3761.4<br>6  | 1964.21      |
| 44 | 1236 | 6-methyl-2-heptanone                 | MS/RI/S/O | camphoreous                            | 0.00         | 28.85       | 182.21       | 401.5<br>4  | 0.00        | 343.99       | 260.96      | 18.38       | 184.53       | 1321.4<br>5  | 139.97      | 78.36        | 322.96      | 1540.0<br>9  | 279.30       | 460.47       | 548.67       | 796.22       |
| 45 | 1238 | $\gamma$ -terpinene                  | MS/RI     | citrus, lime-<br>like                  | 1197.2<br>4  | 121.16      | 194.07       | 121.6<br>5  | 152.63      | 5332.3<br>0  | 531.08      | 137.2<br>0  | 754.97       | 946.15       | 136.27      | 8367.7<br>2  | 910.68      | 935.72       | 1668.70      | 1212.8<br>1  | 759.36       | 1148.37      |

|    |      |                               |           |                                                          |         |         |         |         |         |         |         |         |         |         |         |         |         |         |          |          |         |          |
|----|------|-------------------------------|-----------|----------------------------------------------------------|---------|---------|---------|---------|---------|---------|---------|---------|---------|---------|---------|---------|---------|---------|----------|----------|---------|----------|
| 46 | 1240 | 2-pentylfuran                 | MS/RI/S/O | fruity, metallic                                         | 560.38  | 160.73  | 892.23  | 476.89  | 243.99  | 1541.62 | 1585.35 | 215.16  | 746.26  | 7571.23 | 833.45  | 875.77  | 5403.40 | 9412.96 | 1975.29  | 8081.50  | 6373.03 | 10424.37 |
| 47 | 1242 | trans- $\beta$ -ocimene       | MS/RI     | sweet, herb                                              | 2214.73 | 723.51  | 243.29  | 89.96   | 0.00    | 3392.52 | 787.33  | 0.00    | 4621.16 | 2192.26 | 0.00    | 430.87  | 1650.19 | 1568.14 | 0.00     | 7875.44  | 4157.04 | 0.00     |
| 48 | 1243 | (E)-2-heptenal                | MS/RI/S/O | soap, fatty                                              | 0.00    | 224.01  | 8168.60 | 0.00    | 0.00    | 0.00    | 0.00    | 0.00    | 0.00    | 0.00    | 91.15   | 0.00    | 0.00    | 0.00    | 0.00     | 0.00     | 0.00    | 6525.66  |
| 49 | 1248 | prenyl acetate                | MS/RI     | sweet, banana, fruity, ripe floral, green citrus, woody  | 0.00    | 0.00    | 0.00    | 0.00    | 0.00    | 0.00    | 0.00    | 0.00    | 0.00    | 0.00    | 0.00    | 0.00    | 0.00    | 0.00    | 0.00     | 0.00     | 132.27  | 0.00     |
| 50 | 1251 | ocimene                       | MS/RI/S/O | citrus, woody                                            | 2825.76 | 975.98  | 642.86  | 0.00    | 409.07  | 4974.65 | 1073.11 | 147.91  | 6088.38 | 2804.41 | 564.11  | 3762.31 | 9307.20 | 1783.03 | 15335.67 | 10751.45 | 5728.68 | 37077.94 |
| 51 | 1253 | methyl (Z)-3-hexenoate        | MS/RI/S/O | fruity floral                                            | 0.00    | 0.00    | 0.00    | 0.00    | 0.00    | 0.00    | 0.00    | 0.00    | 0.00    | 4971.66 | 0.00    | 0.00    | 0.00    | 4572.68 | 0.00     | 0.00     | 0.00    | 0.00     |
| 52 | 1255 | 1-pentanol                    | MS/RI/S/O | fusel, sweet green, waxy, fresh                          | 996.16  | 621.42  | 478.82  | 1904.27 | 1680.36 | 2798.50 | 6048.78 | 2878.58 | 4875.22 | 2109.92 | 3653.81 | 2394.60 | 4540.89 | 3530.85 | 600.93   | 3188.98  | 2854.81 | 2823.23  |
| 53 | 1258 | cis- $\beta$ -hexenyl formate | MS/RI/S/O | vegetable, fruity, apple, guava, green banana            | 0.00    | 0.00    | 0.00    | 0.00    | 0.00    | 97.42   | 0.00    | 0.00    | 0.00    | 137.68  | 0.00    | 0.00    | 0.00    | 0.00    | 20.99    | 0.00     | 0.00    | 221.57   |
| 54 | 1264 | methylpyrazine                | MS/RI/S/O | nutty, roasted                                           | 591.30  | 235.98  | 0.00    | 34.37   | 0.00    | 11.00   | 550.80  | 11.46   | 300.96  | 3319.94 | 68.44   | 55.21   | 46.43   | 6599.04 | 501.45   | 1543.77  | 571.55  | 83.37    |
| 55 | 1280 | hexyl acetate                 | MS/RI/S/O | fruity, green, fresh, sweet, banana peel, apple and pear | 0.00    | 211.80  | 194.89  | 0.00    | 0.00    | 279.23  | 173.34  | 11.39   | 309.98  | 0.00    | 0.00    | 0.00    | 0.00    | 0.00    | 418.56   | 0.00     | 303.54  | 1268.32  |
| 56 | 1280 | octanal                       | MS/RI/S/O | fat, soap,                                               | 1141.77 | 1909.86 | 2409.84 | 2390.47 | 1275.25 | 2217.45 | 2310.93 | 840.86  | 2054.31 | 4312.61 | 1171.79 | 1320.48 | 2250.68 | 2769.45 | 1574.72  | 2324.54  | 4348.15 | 6090.24  |
| 57 | 1284 | methyl (2E)-2-hexenoate       | MS/RI/S/O | fruity, green, banana, honey                             | 0.00    | 0.00    | 0.00    | 0.00    | 0.00    | 0.00    | 0.00    | 0.00    | 0.00    | 2736.97 | 0.00    | 0.00    | 0.00    | 0.00    | 0.00     | 1442.92  | 0.00    | 0.00     |
| 58 | 1285 | 2-octanone                    | MS/RI/S   | dairy,cheese,                                            | 206.35  | 0.00    | 15.27   | 18.96   | 0.00    | 194.98  | 0.00    | 48.03   | 0.00    | 1705.69 | 350.50  | 63.35   | 115.45  | 3157.34 | 311.02   | 1296.11  | 924.71  | 1589.27  |
| 59 | 1310 | (Z)-2-penten-1-ol             | MS/RI/S/O | green, spicy                                             | 246.01  | 281.30  | 6638.57 | 1023.95 | 0.00    | 1081.53 | 1868.35 | 297.82  | 1009.54 | 2617.39 | 2226.47 | 3231.79 | 3933.67 | 4569.43 | 888.32   | 2114.90  | 1785.97 | 2687.01  |
| 60 | 1313 | 1-octen-3-one                 | MS/RI/S/O | mushroom, metal                                          | 0.00    | 59.32   | 705.97  | 109.72  | 326.03  | 0.00    | 964.95  | 273.84  | 584.14  | 451.86  | 234.36  | 0.00    | 0.00    | 0.00    | 0.00     | 0.00     | 0.00    | 0.00     |
| 61 | 1315 | cis-3-hexenyl-1-acetate       | MS/RI/S   | green fruity apple and pear, with fresh tropical nuances | 83.66   | 0.00    | 3233.19 | 21.82   | 72.47   | 3699.97 | 0.00    | 26.34   | 66.36   | 618.07  | 0.00    | 159.98  | 72.96   | 0.00    | 0.00     | 0.00     | 0.00    | 2072.38  |
| 62 | 1321 | trans-2-pentenol              | MS/RI/S   | mushroom                                                 | 0.00    | 0.00    | 661.31  | 48.96   | 46.59   | 66.32   | 222.74  | 19.84   | 143.65  | 341.82  | 318.21  | 278.64  | 350.03  | 30.56   | 106.58   | 208.93   | 226.42  | 294.35   |
| 63 | 1323 | 2,5-dimethylpyrazine          | MS/RI/S/O | cocoa, roasted nuts, roast beef, woody grass             | 0.00    | 138.02  | 0.00    | 0.00    | 0.00    | 0.00    | 3092.80 | 0.00    | 126.32  | 3667.41 | 0.00    | 0.00    | 0.00    | 8693.05 | 0.00     | 0.00     | 0.00    | 0.00     |

|    |                 |                                     |           |                                                                                                         |              |             |              |             |              |              |              |             |              |              |              |              |              |              |         |              |              |              |
|----|-----------------|-------------------------------------|-----------|---------------------------------------------------------------------------------------------------------|--------------|-------------|--------------|-------------|--------------|--------------|--------------|-------------|--------------|--------------|--------------|--------------|--------------|--------------|---------|--------------|--------------|--------------|
| 64 | 1328            | 2,6-dimethylpyrazine                | MS/RI/S   | meaty, nutty,<br>roasted cocoa,<br>brothy<br>bready,<br>coffee, musty<br>nutty, musty,<br>casky, woody, | 279.25       | 0.00        | 0.00         | 28.59       | 0.00         | 0.00         | 346.18       | 0.00        | 158.77       | 0.00         | 0.00         | 0.00         | 0.00         | 2915.2<br>4  | 98.78   | 176.54       | 206.94       | 0.00         |
| 65 | 1333            | 2-ethylpyrazine                     | MS/RI/S/O | potato, earthy<br>and cocoa<br>with a fishy<br>nuance                                                   | 0.00         | 0.00        | 0.00         | 0.00        | 0.00         | 0.00         | 364.26       | 0.00        | 160.99       | 3537.2<br>2  | 0.00         | 0.00         | 0.00         | 4125.3<br>5  | 0.00    | 719.97       | 100.41       | 0.00         |
| 66 | 1335            | 2,2,6-trimethyl-<br>cyclohexanone   | MS/RI/S   | honey cistus                                                                                            | 796.38       | 184.74      | 905.10       | 536.2<br>8  | 160.93       | 841.79       | 1436.4<br>7  | 280.2<br>5  | 631.18       | 5894.4<br>3  | 1052.0<br>4  | 534.37       | 2676.5<br>0  | 10608.<br>02 | 3927.27 | 3251.7<br>2  | 4254.3<br>1  | 4662.06      |
| 67 | 1336            | 6-methyl-5-hepten-2-one             | MS/RI/S/O | green,<br>vegetative<br>nutty,<br>cocoa,<br>roasted<br>coffee,<br>bready                                | 2496.7<br>6  | 444.15      | 11910.<br>47 | 4570.<br>40 | 971.97       | 3852.2<br>0  | 4931.1<br>8  | 757.0<br>5  | 2973.8<br>5  | 24699.<br>44 | 8831.8<br>4  | 11216.<br>09 | 9581.0<br>0  | 22187.<br>32 | 5244.11 | 12798.<br>81 | 9518.7<br>9  | 17369.6<br>7 |
| 68 | 1346            | 2, 3-dimethylpyrazine               | MS/RI/S   |                                                                                                         | 108.49       | 15.55       | 0.00         | 23.63       | 0.00         | 0.00         | 135.62       | 0.00        | 92.72        | 277.37       | 10.60        | 23.60        | 0.00         | 1281.2<br>2  | 87.00   | 268.36       | 161.24       | 0.00         |
| 69 | 1354.9742<br>87 | (Z)-3-hexenyl-2-<br>methylbutanoate | MS/RI/S/O | herb, sweet                                                                                             | 141.55       | 0.00        | 403.88       | 25.27       | 74.05        | 3344.1<br>7  | 3956.6<br>2  | 21.43       | 3226.9<br>4  | 4037.1<br>1  | 220.29       | 1076.2<br>6  | 1003.8<br>9  | 1917.8<br>7  | 719.06  | 812.39       | 2036.6<br>1  | 15203.1<br>5 |
| 70 | 1360            | 1-hexanol                           | MS/RI/S/O | resin, flower                                                                                           | 0.00         | 272.63      | 1683.3<br>0  | 408.0<br>2  | 0.00         | 4129.5<br>5  | 1748.7<br>3  | 153.1<br>0  | 2645.0<br>2  | 674.66       | 612.33       | 0.00         | 1385.6<br>2  | 0.00         | 7126.98 | 4396.9<br>8  | 2889.0<br>6  | 7149.59      |
| 71 | 1377            | dimethyl trisulfide                 | MS/RI/S/O | sulfur, fish,<br>cabbage                                                                                | 31.95        | 0.00        | 0.00         | 0.00        | 5.97         | 0.00         | 67.49        | 0.00        | 94.72        | 0.00         | 0.00         | 0.00         | 0.00         | 0.00         | 36.48   | 78.34        | 0.00         | 0.00         |
| 72 | 1385            | nonanal                             | MS/RI/S/O | fat, citrus                                                                                             | 12191.<br>92 | 2390.9<br>5 | 10508.<br>28 | 7889.<br>29 | 18627.<br>91 | 14908.<br>53 | 10159.<br>18 | 6053.<br>24 | 10270.<br>10 | 9323.3<br>3  | 2889.7<br>8  | 4550.3<br>5  | 5179.1<br>1  | 6057.1<br>9  | 8584.77 | 9103.2<br>7  | 14973.<br>70 | 10714.9<br>2 |
| 73 | 1385            | 2-ethyl-6-methylpyrazine            | MS/RI/S/O | roasted<br>hazelnut                                                                                     | 648.04       | 121.83      | 0.00         | 0.00        | 0.00         | 19.00        | 1169.1<br>4  | 0.00        | 162.29       | 2376.4<br>2  | 53.79        | 0.00         | 0.00         | 3496.9<br>9  | 0.00    | 442.02       | 0.00         | 0.00         |
| 74 | 1386            | (Z)-3-hexen-1-ol                    | MS/RI/S/O | grass                                                                                                   | 364.55       | 768.94      | 7347.5<br>0  | 1628.<br>34 | 1358.2<br>2  | 13397.<br>06 | 6741.9<br>7  | 241.3<br>0  | 154.94       | 148.85       | 0.00         | 441.31       | 0.00         | 922.12       | 87.63   | 7923.3<br>7  | 7772.9<br>4  | 0.00         |
| 75 | 1392            | 2-ethyl-5-methylpyrazine            | MS/RI/S/O | coffee bean,<br>nutty,<br>grassy,<br>roasted                                                            | 0.00         | 0.00        | 0.00         | 52.96       | 0.00         | 50.28        | 1810.5<br>1  | 0.00        | 802.52       | 3804.1<br>1  | 0.00         | 0.00         | 0.00         | 4901.8<br>4  | 0.00    | 1034.4<br>2  | 0.00         | 0.00         |
| 76 | 1394            | 1-octen-3-ol                        | MS/RI/S/O | mushroom                                                                                                | 1965.6<br>9  | 429.86      | 3440.2<br>8  | 1747.<br>77 | 1072.3<br>3  | 3738.2<br>0  | 9584.6<br>1  | 934.8<br>7  | 8744.1<br>9  | 5252.6<br>1  | 1806.4<br>6  | 1193.2<br>5  | 3109.4<br>9  | 6670.9<br>5  | 2944.96 | 5165.3<br>6  | 6561.5<br>7  | 6995.70      |
| 77 | 1397            | 2,4-hexadienal                      | MS/RI/S/O | sweet, green,<br>waxy,<br>aldehydic<br>with fresh<br>melon<br>nuances                                   | 25.49        | 0.00        | 230.24       | 55.46       | 11.91        | 0.00         | 62.58        | 0.00        | 35.79        | 1052.3<br>2  | 301.71       | 179.90       | 62.13        | 838.57       | 283.65  | 454.30       | 854.29       | 2398.98      |
| 78 | 1401            | (E,E)-2,4-heptadienal               | MS/RI/S/O | nut, fat                                                                                                | 5167.5<br>5  | 312.64      | 68818.<br>40 | 2895.<br>33 | 801.16       | 3398.4<br>7  | 6018.1<br>8  | 1175.<br>34 | 1780.8<br>1  | 35557.<br>95 | 15957.<br>48 | 17430.<br>98 | 22625.<br>21 | 45926.<br>57 | 3513.04 | 7815.0<br>2  | 12779.<br>12 | 41283.5<br>7 |
| 79 | 1410            | (E)-2-hexenol                       | MS/RI/S   | green                                                                                                   | 0.00         | 30.54       | 1316.7<br>8  | 0.00        | 38.15        | 3514.3<br>7  | 760.40       | 19.72       | 1148.2<br>8  | 385.69       | 0.00         | 0.00         | 0.00         | 1680.1<br>7  | 4146.75 | 1189.0<br>4  | 26.15        | 2672.28      |
| 80 | 1414            | 3-octen-2-one                       | MS/RI/S/O | creamy                                                                                                  | 0.00         | 43.40       | 667.01       | 279.1<br>6  | 72.88        | 688.75       | 0.00         | 51.75       | 0.00         | 0.00         | 1182.2<br>3  | 300.23       | 551.32       | 0.00         | 0.00    | 2571.5<br>8  | 2667.8<br>9  | 8094.17      |
| 81 | 1414            | 2-ethyl-3-methylpyrazine            | MS/RI/S/O | nutty peanut,<br>musty corn-<br>like with raw<br>and oily                                               | 1275.7<br>7  | 21.25       | 0.00         | 0.00        | 0.00         | 0.00         | 691.62       | 0.00        | 306.27       | 4894.3<br>6  | 0.00         | 0.00         | 0.00         | 6800.9<br>7  | 0.00    | 0.00         | 0.00         | 0.00         |

| nuances |      |                                 |           |                                                   |         |         |          |         |         |          |          |         |         |          |         |          |          |          |          |          |          |          |
|---------|------|---------------------------------|-----------|---------------------------------------------------|---------|---------|----------|---------|---------|----------|----------|---------|---------|----------|---------|----------|----------|----------|----------|----------|----------|----------|
| 82      | 1420 | acetic acid, 2-ethylhexyl ester | MS/RI/S/O | herbal                                            | 1193.86 | 0.00    | 2073.81  | 834.34  | 1154.70 | 5026.00  | 5080.67  | 996.04  | 4246.88 | 0.00     | 39.76   | 81.39    | 140.38   | 249.50   | 1151.50  | 900.45   | 743.49   | 1512.99  |
| 83      | 1420 | (Z)-linalool oxide              | MS/RI/S/O | flower                                            | 0.00    | 0.00    | 2606.83  | 0.00    | 0.00    | 11920.79 | 2315.97  | 84.56   | 3604.25 | 13997.84 | 4626.74 | 2357.14  | 0.00     | 0.00     | 19776.82 | 31333.58 | 21423.15 | 24944.27 |
| 84      | 1428 | 2-propyl pyrazine               | MS/RI/S/O | green, burnt                                      | 0.00    | 0.00    | 0.00     | 0.00    | 0.00    | 0.00     | 0.00     | 0.00    | 0.00    | 282.80   | 0.00    | 0.00     | 0.00     | 0.00     | 53.40    | 112.86   | 0.00     | 0.00     |
| 85      | 1431 | hexyl 2-methylbutyrate          | MS/RI/S/O | waxy, unripe<br>fruity, apple<br>and banana       | 0.00    | 0.00    | 0.00     | 0.00    | 0.00    | 193.29   | 224.03   | 0.00    | 204.75  | 3174.28  | 136.81  | 146.13   | 221.41   | 2264.82  | 160.71   | 382.63   | 421.01   | 7336.18  |
| 86      | 1436 | ethyl octanoate                 | MS/RI/S   | fruit, fat                                        | 207.08  | 0.00    | 249.22   | 204.36  | 140.31  | 546.91   | 946.71   | 53.53   | 637.09  | 0.00     | 0.00    | 128.79   | 0.00     | 341.88   | 805.18   | 608.69   | 1099.03  | 0.00     |
| 87      | 1437 | (E)-2-octenal                   | MS/RI/S/O | cucumber<br>fatty green                           | 1034.69 | 109.19  | 7139.11  | 1004.31 | 301.47  | 864.69   | 1228.97  | 336.59  | 366.92  | 0.00     | 2266.71 | 2022.38  | 5099.49  | 9633.99  | 1317.76  | 3621.26  | 9563.16  | 11464.11 |
| 88      | 1449 | (E)-linalool oxide              | MS/RI/S/O | flower                                            | 3278.23 | 2261.74 | 5553.24  | 390.06  | 47.03   | 18255.55 | 3841.98  | 70.12   | 6086.74 | 8011.43  | 2076.28 | 1346.25  | 16700.78 | 16704.47 | 30678.68 | 0.00     | 31774.14 | 38401.10 |
| 89      | 1450 | acetic acid                     | MS/RI/S/O | sour                                              | 0.00    | 0.00    | 0.00     | 68.35   | 0.00    | 92.49    | 113.22   | 0.00    | 184.92  | 1628.18  | 303.85  | 0.00     | 322.25   | 26.32    | 864.86   | 0.00     | 0.00     | 0.00     |
| 90      | 1455 | furfural                        | MS/RI/S/O | bread,<br>almond, sweet                           | 2440.95 | 80.86   | 972.66   | 234.03  | 72.92   | 0.00     | 854.28   | 76.56   | 200.48  | 15248.20 | 993.28  | 161.11   | 837.15   | 11116.69 | 3518.16  | 6086.16  | 1411.90  | 4167.90  |
| 91      | 1464 | cis-3-Hexenyl butyrate          | MS/RI/S/O | fresh, green,<br>oily, waxy,<br>apple and<br>pear | 0.00    | 0.00    | 1679.26  | 90.07   | 0.00    | 7312.63  | 4061.55  | 66.75   | 6174.84 | 3434.94  | 111.51  | 1101.41  | 1280.08  | 2520.85  | 466.98   | 1001.89  | 2310.19  | 16565.22 |
| 92      | 1465 | diallyl disulphide              | MS/RI/S   | green, onion                                      | 0.00    | 0.00    | 0.00     | 0.00    | 0.00    | 0.00     | 0.00     | 0.00    | 0.00    | 0.00     | 0.00    | 0.00     | 0.00     | 0.00     | 71.22    | 0.00     | 134.83   | 0.00     |
| 93      | 1466 | (E)-2-hexen-1-yl butyrate       | MS/RI     | fruity,<br>apricot,<br>banana                     | 0.00    | 0.00    | 0.00     | 0.00    | 0.00    | 1824.50  | 668.10   | 0.00    | 1114.52 | 1122.56  | 95.58   | 104.22   | 231.08   | 1130.00  | 0.00     | 0.00     | 378.17   | 3616.75  |
| 94      | 1467 | heptanol                        | MS/RI/S/O | green                                             | 151.80  | 394.69  | 1017.15  | 506.55  | 106.80  | 3242.02  | 1369.91  | 64.71   | 2512.73 | 1532.06  | 1236.03 | 376.96   | 0.00     | 4982.62  | 362.93   | 2499.85  | 2208.60  | 4313.06  |
| 95      | 1468 | 6-methyl-5-hepten-2-ol          | MS/RI     | sweet, oily,<br>green,<br>coriander               | 77.57   | 0.00    | 0.00     | 0.00    | 0.00    | 899.56   | 63.15    | 0.00    | 64.04   | 131.64   | 0.00    | 0.00     | 377.29   | 144.85   | 0.00     | 386.74   | 0.00     | 1150.07  |
| 96      | 1484 | decanal                         | MS/RI/S   | soap, orange                                      | 2131.24 | 1250.01 | 2093.60  | 994.47  | 468.19  | 1573.59  | 3065.63  | 707.75  | 2160.10 | 0.00     | 421.43  | 1029.82  | 1466.89  | 0.00     | 1756.22  | 2497.44  | 3802.26  | 5161.72  |
| 97      | 1487 | 2-ethyl-1-hexanol               | MS/RI/S/O | sweet fatty<br>fruity                             | 1821.26 | 146.29  | 1689.95  | 1415.14 | 1431.38 | 3585.65  | 4729.88  | 1849.69 | 5899.98 | 1734.04  | 536.23  | 11755.33 | 818.92   | 2883.99  | 5368.70  | 3578.26  | 4031.51  | 1176.77  |
| 98      | 1488 | $\alpha$ -copaene               | MS/RI     | wood, spice                                       | 0.00    | 0.00    | 0.00     | 0.00    | 13.79   | 406.43   | 160.92   | 8.88    | 0.00    | 0.00     | 21.49   | 0.00     | 0.00     | 0.00     | 0.00     | 222.45   | 0.00     | 0.00     |
| 99      | 1490 | 2-acetylfruran                  | MS/RI/S/O | nutty and<br>roasted with a<br>sweet              | 226.97  | 81.44   | 220.79   | 103.87  | 23.40   | 70.04    | 848.32   | 24.41   | 365.05  | 4618.61  | 231.55  | 131.70   | 231.32   | 6608.62  | 733.43   | 465.57   | 672.35   | 370.42   |
| 100     | 1493 | 2-decanone                      | MS/RI     | orange floral<br>fatty peach                      | 167.92  | 0.00    | 0.00     | 87.06   | 0.00    | 0.00     | 0.00     | 0.00    | 56.42   | 2518.65  | 109.95  | 0.00     | 92.87    | 3169.98  | 208.89   | 778.34   | 598.03   | 1599.66  |
| 101     | 1495 | benzaldehyde                    | MS/RI/S/O | almond, burnt<br>sugar                            | 5613.92 | 2097.18 | 15227.38 | 4526.08 | 1336.45 | 9517.17  | 10397.69 | 2364.83 | 6110.26 | 36952.14 | 8415.62 | 13355.95 | 8706.01  | 39766.98 | 28802.02 | 38499.87 | 31233.08 | 44174.81 |
| 102     | 1497 | 3,5-diethyl-2-methylpyrazine    | MS/RI/S   | green, nutty                                      | 332.08  | 0.00    | 0.00     | 0.00    | 0.00    | 0.00     | 0.00     | 0.00    | 0.00    | 2248.26  | 0.00    | 0.00     | 0.00     | 4682.70  | 0.00     | 0.00     | 0.00     | 0.00     |
| 103     | 1498 | pyrrole                         | MS/RI     | sweet, nutty                                      | 270.68  | 0.00    | 30.09    | 13.26   | 0.00    | 0.00     | 84.85    | 31.17   | 102.53  | 108.87   | 114.80  | 0.00     | 45.37    | 195.53   | 62.32    | 40.48    | 0.00     | 0.00     |



|     |      |                                                |           |                                                                     |          |          |          |         |         |          |          |         |          |          |          |          |          |          |           |          |          |          |
|-----|------|------------------------------------------------|-----------|---------------------------------------------------------------------|----------|----------|----------|---------|---------|----------|----------|---------|----------|----------|----------|----------|----------|----------|-----------|----------|----------|----------|
| 104 | 1506 | 3-nonen-2-one                                  | MS/RI/S/O | spicy fatty woody                                                   | 76.46    | 0.00     | 211.58   | 95.60   | 0.00    | 85.99    | 58.58    | 0.00    | 67.98    | 3523.74  | 0.00     | 136.80   | 142.82   | 3380.81  | 289.96    | 1233.57  | 1416.32  | 4612.08  |
| 105 | 1523 | propanoic acid                                 | MS/RI/S   | acidic                                                              | 0.00     | 30.68    | 0.00     | 0.00    | 0.00    | 0.00     | 0.00     | 0.00    | 0.00     | 107.62   | 0.00     | 0.00     | 0.00     | 163.02   | 69.97     | 65.97    | 71.96    | 70.67    |
| 106 | 1523 | 2,6,10,10-tetramethyl-1-oxaspiro[4.5]dec-6-ene | MS/RI     | tea, herbal, wet, tobacco, leaf, metallic, woody, spicy sweet green | 816.20   | 0.00     | 0.00     | 58.48   | 37.19   | 58.36    | 252.22   | 26.95   | 26.65    | 1303.26  | 98.65    | 0.00     | 668.18   | 624.91   | 1009.75   | 311.96   | 1038.50  | 2294.56  |
| 107 | 1525 | amyl hexanoate                                 | MS/RI     | fruity, pineapple apple pear, fatty                                 | 0.00     | 0.00     | 0.00     | 0.00    | 0.00    | 37.85    | 96.32    | 0.00    | 36.45    | 605.72   | 0.00     | 0.00     | 0.00     | 511.80   | 0.00      | 265.20   | 210.23   | 1785.10  |
| 108 | 1531 | 3,5-octadien-2-one                             | MS/RI/S/O | fruit, fat, mushroom                                                | 21.50    | 0.00     | 2652.21  | 0.00    | 16.90   | 2239.59  | 48.31    | 42.57   | 13.29    | 14768.01 | 0.00     | 0.00     | 0.00     | 14446.46 | 28.87     | 14565.56 | 15133.44 | 0.00     |
| 109 | 1537 | linalool                                       | MS/RI/S/O | flower, lavender                                                    | 18976.86 | 14541.94 | 12483.37 | 793.68  | 2405.59 | 51941.71 | 18061.88 | 2537.05 | 38687.22 | 20568.46 | 11181.17 | 11722.40 | 46325.43 | 12784.53 | 107057.42 | 76265.55 | 43993.54 | 70913.02 |
| 110 | 1542 | furfuryl acetate                               | MS/RI     | estery, green banana peel, nasturtium                               | 55.92    | 0.00     | 0.00     | 0.00    | 0.00    | 0.00     | 0.00     | 0.00    | 0.00     | 280.95   | 0.00     | 0.00     | 0.00     | 1368.18  | 0.00      | 0.00     | 0.00     | 0.00     |
| 111 | 1544 | (E)-2-nonenal                                  | MS/RI/S   | soapy, cucumber                                                     | 0.00     | 155.81   | 0.00     | 0.00    | 0.00    | 0.00     | 0.00     | 0.00    | 40.80    | 0.00     | 0.00     | 0.00     | 654.43   | 2505.56  | 0.00      | 0.00     | 105.12   | 0.00     |
| 112 | 1547 | (Z)-2-octen-1-ol                               | MS/RI/S   | sweet floral                                                        | 790.54   | 0.00     | 5083.86  | 0.00    | 100.69  | 0.00     | 3.74     | 0.00    | 0.00     | 0.00     | 0.00     | 0.00     | 0.00     | 0.00     | 202.73    | 1356.16  | 984.49   | 0.00     |
| 113 | 1553 | 1-octanol                                      | MS/RI/S   | chemical, metal, burnt                                              | 1177.62  | 993.72   | 3307.49  | 195.96  | 774.07  | 3883.27  | 3809.54  | 596.70  | 3140.19  | 7925.03  | 0.00     | 0.00     | 0.00     | 0.00     | 1939.95   | 3020.70  | 0.00     | 8440.30  |
| 114 | 1555 | (E,E)-2,6-nonadienal                           | MS/RI/S   | cucumber, melon, fatty                                              | 141.00   | 116.33   | 1733.20  | 50.50   | 0.00    | 0.00     | 0.00     | 0.00    | 0.00     | 1213.20  | 207.16   | 341.34   | 0.00     | 0.00     | 469.24    | 0.00     | 0.00     | 0.00     |
| 115 | 1560 | formic acid, octyl ester                       | MS/RI     | orange, citrus                                                      | 0.00     | 0.00     | 0.00     | 1195.79 | 0.00    | 0.00     | 0.00     | 0.00    | 0.00     | 0.00     | 1710.44  | 1909.05  | 2055.16  | 8010.10  | 0.00      | 979.74   | 5216.30  | 603.18   |
| 116 | 1560 | 5-methylfurfural                               | MS/RI/S/O | almond, caramel, burnt sugar                                        | 1014.64  | 0.00     | 223.48   | 57.96   | 19.12   | 51.47    | 409.85   | 26.03   | 110.97   | 16258.14 | 432.89   | 0.00     | 184.45   | 13526.65 | 902.15    | 2659.76  | 596.67   | 0.00     |
| 117 | 1563 | (Z)-3-octen-1-ol                               | MS/RI     | fatty, citrus                                                       | 0.00     | 0.00     | 54.35    | 0.00    | 0.00    | 187.40   | 0.00     | 0.00    | 84.58    | 0.00     | 0.00     | 0.00     | 0.00     | 0.00     | 0.00      | 0.00     | 0.00     | 0.00     |
| 118 | 1563 | 2-methylpropionic acid                         | MS/RI     | rancid, butter, cheese                                              | 0.00     | 0.00     | 0.00     | 0.00    | 0.00    | 0.00     | 0.00     | 0.00    | 0.00     | 0.00     | 0.00     | 0.00     | 0.00     | 0.00     | 77.59     | 55.94    | 0.00     | 0.00     |
| 119 | 1569 | linalyl acetate                                | MS/RI     | sweet, fruit                                                        | 0.00     | 0.00     | 0.00     | 0.00    | 0.00    | 0.00     | 79.36    | 0.00    | 77.07    | 0.00     | 0.00     | 0.00     | 130.68   | 0.00     | 203.50    | 359.78   | 299.96   | 0.00     |
| 120 | 1570 | isocaryophyllene                               | MS/RI     | wood                                                                | 0.00     | 0.00     | 57.35    | 0.00    | 27.45   | 0.00     | 269.52   | 0.00    | 9.52     | 0.00     | 0.00     | 0.00     | 0.00     | 0.00     | 0.00      | 0.00     | 0.00     | 0.00     |
| 121 | 1570 | (E,E)-3,5-octadien-2-one                       | MS/RI/S/O | fruity green grassy                                                 | 247.46   | 123.91   | 4779.86  | 1364.28 | 131.37  | 736.56   | 3374.81  | 400.98  | 1579.28  | 6974.60  | 4463.29  | 2927.81  | 6926.49  | 6578.76  | 875.88    | 7132.75  | 6117.17  | 36433.41 |
| 122 | 1575 | (E,Z)-2,6-nonadienal                           | MS/RI/S   | cucumber, green                                                     | 0.00     | 0.00     | 972.77   | 0.00    | 12.06   | 0.00     | 0.00     | 25.81   | 13.05    | 0.00     | 0.00     | 0.00     | 425.91   | 1961.15  | 0.00      | 1756.06  | 1707.93  | 3096.69  |
| 123 | 1582 | 6-methyl-3,5-heptadiene-2-one                  | MS/RI/S   | green, sweet,                                                       | 0.00     | 0.00     | 0.00     | 0.00    | 0.00    | 0.00     | 0.00     | 0.00    | 71.96    | 6081.52  | 442.14   | 295.59   | 713.47   | 3768.64  | 624.69    | 2146.69  | 2865.17  | 3078.27  |
| 124 | 1590 | trans-2-decenal                                | MS/RI     | fatty,mushroom                                                      | 0.00     | 0.00     | 620.01   | 64.91   | 26.55   | 232.77   | 0.00     | 43.57   | 37.41    | 0.00     | 297.45   | 494.30   | 0.00     | 0.00     | 0.00      | 0.00     | 27.06    | 0.00     |

|         |      |                                     |           |                                                                                                                  |              |        |             |             |        |             |             |            |             |              |             |             |              |              |         |              |              |              |
|---------|------|-------------------------------------|-----------|------------------------------------------------------------------------------------------------------------------|--------------|--------|-------------|-------------|--------|-------------|-------------|------------|-------------|--------------|-------------|-------------|--------------|--------------|---------|--------------|--------------|--------------|
| 12<br>5 | 1590 | $\beta$ -cyclocitral                | MS/RI/S/O | tropical<br>saffron herbal<br>clean rose<br>oxide sweet<br>tobacco<br>damascone<br>fruity                        | 2725.9<br>6  | 835.62 | 3925.4<br>7 | 1142.<br>64 | 406.68 | 2509.7<br>2 | 3934.2<br>2 | 781.5<br>7 | 1318.0<br>9 | 16322.<br>64 | 3136.3<br>0 | 3554.2<br>0 | 13842.<br>42 | 14559.<br>69 | 9245.01 | 8699.5<br>5  | 11940.<br>99 | 18584.3<br>6 |
| 12<br>6 | 1591 | terpinen-4-ol                       | MS/RI     | nutmeg, must                                                                                                     | 753.16       | 0.00   | 624.14      | 36.70       | 21.27  | 526.97      | 98.20       | 31.52      | 208.94      | 1001.5<br>9  | 274.36      | 406.49      | 40.20        | 1168.9<br>2  | 0.00    | 0.00         | 0.00         | 0.00         |
| 12<br>7 | 1593 | 2-acetyl-5-methylfuran              | MS/RI     | nutty, cocoa,<br>toasted<br>bready                                                                               | 0.00         | 0.00   | 0.00        | 0.00        | 0.00   | 29.19       | 26.87       | 0.00       | 0.00        | 241.26       | 24.88       | 0.00        | 0.00         | 132.02       | 54.25   | 300.81       | 143.26       | 569.07       |
| 12<br>8 | 1594 | $\beta$ -caryophyllene              | MS/RI     | wood, spice                                                                                                      | 0.00         | 0.00   | 0.00        | 69.32       | 0.00   | 0.00        | 0.00        | 0.00       | 0.00        | 0.00         | 0.00        | 0.00        | 0.00         | 0.00         | 0.00    | 0.00         | 0.00         | 0.00         |
| 12<br>9 | 1595 | dimethyl sulfoxide                  | MS/RI/S   | fatty,<br>cheesy,<br>garlic,<br>mushroom                                                                         | 647.70       | 135.13 | 295.34      | 138.7<br>6  | 359.28 | 367.55      | 1144.2<br>9 | 571.9<br>1 | 688.76      | 0.00         | 416.13      | 188.79      | 625.26       | 0.00         | 148.15  | 246.65       | 0.00         | 68.11        |
| 13<br>0 | 1595 | isophorone                          | MS/RI     | sweet, citrus                                                                                                    | 76.39        | 186.70 | 833.92      | 0.00        | 0.00   | 277.70      | 87.79       | 5.68       | 39.88       | 1850.7<br>9  | 1442.2<br>1 | 76.31       | 89.54        | 1566.1<br>9  | 154.22  | 672.84       | 809.24       | 0.00         |
| 13<br>1 | 1596 | safranal                            | MS/RI     | woody,<br>medicinal,<br>phenolic,<br>spicy and<br>camphoreous<br>with a fruity,<br>herbal nuance<br>herbal fresh | 2083.6<br>6  | 85.38  | 516.51      | 525.6<br>8  | 314.56 | 230.51      | 1861.7<br>7 | 319.4<br>3 | 582.51      | 10739.<br>91 | 1094.8<br>5 | 350.38      | 1772.0<br>6  | 11845.<br>03 | 7328.46 | 4870.4<br>5  | 10832.<br>79 | 6996.02      |
| 13<br>2 | 1599 | hexyl hexanoate                     | MS/RI/S/O | cut grass<br>vegetable<br>fruity                                                                                 | 0.00         | 0.00   | 52.92       | 0.00        | 16.17  | 684.73      | 817.34      | 0.00       | 350.05      | 12998.<br>32 | 715.16      | 636.23      | 1178.2<br>4  | 7662.2<br>0  | 0.00    | 0.00         | 1115.1<br>4  | 14127.3<br>2 |
| 13<br>3 | 1600 | hexadecane                          | MS/RI     | alkane                                                                                                           | 0.00         | 0.00   | 0.00        | 0.00        | 0.00   | 156.96      | 56.89       | 0.00       | 0.00        | 0.00         | 0.00        | 219.56      | 0.00         | 1269.1<br>6  | 0.00    | 0.00         | 37.61        | 719.94       |
| 13<br>4 | 1600 | bornyl acetate                      | MS/RI     | camphoreous,<br>woody,<br>mentholic,<br>berry, soapy                                                             | 0.00         | 0.00   | 48.58       | 72.30       | 0.00   | 27.93       | 0.00        | 0.00       | 0.00        | 200.74       | 0.00        | 51.41       | 0.00         | 0.00         | 0.00    | 114.07       | 0.00         | 0.00         |
| 13<br>5 | 1602 | octyl butyrate                      | MS/RI     | fresh waxy,<br>fruity,flor                                                                                       | 0.00         | 0.00   | 0.00        | 0.00        | 0.00   | 0.00        | 0.00        | 0.00       | 0.00        | 0.00         | 0.00        | 0.00        | 0.00         | 0.00         | 0.00    | 0.00         | 0.00         | 0.00         |
| 13<br>6 | 1606 | (3Z)-3-hexenyl (2E)-2-butenolate    | MS/RI     | green,<br>vegetable                                                                                              | 0.00         | 0.00   | 0.00        | 0.00        | 0.00   | 0.00        | 35.22       | 0.00       | 0.00        | 0.00         | 0.00        | 0.00        | 0.00         | 136.90       | 52.78   | 0.00         | 0.00         | 0.00         |
| 13<br>7 | 1610 | (E)-2-octenol                       | MS/RI/S   | citrus,fatty                                                                                                     | 0.00         | 182.36 | 26.90       | 287.7<br>4  | 43.37  | 723.49      | 2197.8<br>6 | 157.0<br>9 | 2394.2<br>5 | 1111.4<br>6  | 199.17      | 377.00      | 358.89       | 1535.6<br>1  | 0.00    | 0.00         | 0.00         | 1456.04      |
| 13<br>8 | 1615 | (E,E)-2,4-octadienal                | MS/RI     | green,<br>fruity,<br>melon,<br>citrus,<br>fatty, tallow                                                          | 0.00         | 0.00   | 549.86      | 41.60       | 0.00   | 0.00        | 71.87       | 0.00       | 31.11       | 1040.5<br>3  | 8.53        | 146.89      | 0.00         | 1257.6<br>1  | 163.29  | 0.00         | 0.00         | 1168.21      |
| 13<br>9 | 1616 | 1-ethyl-1H-pyrrole-2-carboxaldehyde | MS/RI/S/O | burnt                                                                                                            | 19832.<br>33 | 177.93 | 0.00        | 0.00        | 764.47 | 126.37      | 7039.3<br>4 | 0.00       | 2688.5<br>2 | 39728.<br>28 | 1140.9<br>6 | 82.30       | 3023.6<br>5  | 0.00         | 0.00    | 15317.<br>71 | 4429.6<br>4  | 4176.47      |
| 14<br>0 | 1616 | $\beta$ -terpineol                  | MS/RI     | pungent<br>earthy woody                                                                                          | 0.00         | 0.00   | 0.00        | 0.00        | 0.00   | 0.00        | 0.00        | 0.00       | 0.00        | 0.00         | 0.00        | 0.00        | 0.00         | 0.00         | 70.03   | 0.00         | 0.00         | 0.00         |

|         |      |                                                         |           |                                                      |          |        |             |            |             |             |             |            |             |             |             |             |             |             |              |          |             |              |
|---------|------|---------------------------------------------------------|-----------|------------------------------------------------------|----------|--------|-------------|------------|-------------|-------------|-------------|------------|-------------|-------------|-------------|-------------|-------------|-------------|--------------|----------|-------------|--------------|
| 14<br>1 | 1616 | 5H-5-methyl-6,7-dihydrocyclopentapyrazine               | MS/RI     | musy, nutty, roasted and grainy with coffee notes    | 0.00     | 0.00   | 0.00        | 0.00       | 0.00        | 0.00        | 20.83       | 0.00       | 0.00        | 400.49      | 0.00        | 0.00        | 0.00        | 499.47      | 0.00         | 0.00     | 0.00        | 0.00         |
| 14<br>2 | 1619 | carbitol                                                | MS/RI     | slightly ethereal                                    | 146.45   | 0.00   | 57.88       | 11.39      | 0.00        | 29.39       | 0.00        | 17.02      | 30.36       | 144.01      | 78.10       | 139.83      | 0.00        | 0.00        | 40.23        | 0.00     | 0.00        | 128.48       |
| 14<br>3 | 1619 | butanoic acid                                           | MS/RI/S   | rancid, cheese, sweat                                | 0.00     | 0.00   | 0.00        | 22.17      | 0.00        | 0.00        | 0.00        | 0.00       | 0.00        | 0.00        | 0.00        | 0.00        | 0.00        | 0.00        | 0.00         | 0.00     | 0.00        | 0.00         |
| 14<br>4 | 1620 | p-menth-1-en-9-al                                       | MS/RI     | spicy, herbal                                        | 203.79   | 0.00   | 0.00        | 0.00       | 0.00        | 136.71      | 116.98      | 0.00       | 16.17       | 233.18      | 200.88      | 0.00        | 0.00        | 1978.5<br>2 | 832.09       | 562.13   | 198.99      | 418.01       |
| 14<br>5 | 1622 | 2-methyl-benzaldehyde                                   | MS/RI     | cherry                                               | 173.91   | 39.21  | 443.54      | 119.5<br>6 | 19.54       | 46.06       | 488.54      | 76.70      | 72.15       | 715.91      | 0.00        | 0.00        | 38.47       | 3639.5<br>4 | 206.31       | 0.00     | 27.61       | 0.00         |
| 14<br>6 | 1622 | 2-acetyl pyrazine                                       | MS/RI     | popcorn, chocolate, hazelnut, coffee                 | 0.00     | 0.00   | 0.00        | 0.00       | 0.00        | 0.00        | 0.00        | 0.00       | 0.00        | 160.46      | 0.00        | 0.00        | 0.00        | 405.49      | 0.00         | 0.00     | 0.00        | 0.00         |
| 14<br>7 | 1622 | linalyl isobutyrate                                     | MS/RI     | floral, fruity, sweet, berry, citrus                 | 0.00     | 0.00   | 0.00        | 39.24      | 0.00        | 0.00        | 0.00        | 0.00       | 0.00        | 0.00        | 0.00        | 0.00        | 0.00        | 0.00        | 0.00         | 0.00     | 0.00        | 0.00         |
| 14<br>8 | 1625 | phenylethanal                                           | MS/RI/S/O | honey, sweet                                         | 380.10   | 714.69 | 2100.3<br>8 | 382.0<br>4 | 373.65      | 1104.8<br>5 | 2591.0<br>4 | 1013.84    | 1428.0<br>6 | 9561.3<br>7 | 11646.94    | 60941.27    | 8762.5<br>1 | 10684.54    | 26447.3<br>3 | 41634.39 | 29539.64    | 38919.0<br>9 |
| 14<br>9 | 1626 | 1-methyl-1H-pyrrole-2-carboxaldehyde                    | MS/RI     | roasted nutty                                        | 17.01    | 0.00   | 0.00        | 127.2<br>1 | 90.20       | 23.34       | 922.11      | 27.81      | 0.00        | 949.00      | 0.00        | 65.13       | 0.00        | 2393.2<br>3 | 142.15       | 0.00     | 0.00        | 208.70       |
| 15<br>0 | 1627 | 3-methyl-benzaldehyde                                   | MS/RI     | fruity, nutty                                        | 0.00     | 0.00   | 0.00        | 35.89      | 0.00        | 55.21       | 287.60      | 42.53      | 0.00        | 0.00        | 349.53      | 246.97      | 0.00        | 609.25      | 630.90       | 0.00     | 1091.4<br>5 | 243.43       |
| 15<br>1 | 1631 | menthol                                                 | MS/RI     | minty                                                | 0.00     | 0.00   | 0.00        | 0.00       | 0.00        | 0.00        | 0.00        | 0.00       | 0.00        | 0.00        | 0.00        | 0.00        | 0.00        | 0.00        | 0.00         | 0.00     | 226.83      | 0.00         |
| 15<br>2 | 1636 | 2-hydroxybenzaldehyde                                   | MS/RI     | spicy, medicinal and astringent                      | 0.00     | 0.00   | 680.83      | 0.00       | 0.00        | 107.55      | 0.00        | 0.00       | 0.00        | 675.95      | 0.00        | 0.00        | 0.00        | 633.48      | 0.00         | 0.00     | 1513.0<br>5 | 0.00         |
| 15<br>3 | 1645 | acetophenone                                            | MS/RI/S   | bitter almond                                        | 0.00     | 155.12 | 2647.5<br>2 | 522.5<br>9 | 355.54      | 1757.4<br>9 | 2479.6<br>9 | 640.7<br>2 | 2588.1<br>8 | 7149.4<br>4 | 0.00        | 0.00        | 0.00        | 8305.2<br>5 | 6532.14      | 0.00     | 44.26       | 0.00         |
| 15<br>4 | 1646 | alloaromadendrene                                       | MS/RI     | woody                                                | 0.00     | 0.00   | 0.00        | 0.00       | 0.00        | 40.17       | 0.00        | 0.00       | 0.00        | 0.00        | 0.00        | 36.67       | 0.00        | 0.00        | 0.00         | 0.00     | 0.00        | 0.00         |
| 15<br>5 | 1646 | 3-hexenyl hexanoate                                     | MS/RI/S/O | green, fruity, fatty, tropical and pulpy with citrus | 243.73   | 69.36  | 0.00        | 99.80      | 1430.9<br>1 | 8618.1<br>2 | 13040.56    | 217.5<br>7 | 8808.0<br>1 | 21212.07    | 1391.2<br>8 | 4356.8<br>6 | 5486.0<br>3 | 7501.2<br>8 | 1004.80      | 0.00     | 6166.1<br>0 | 33066.9<br>3 |
| 15<br>6 | 1646 | α-caryophyllene                                         | MS/RI/S   | woody                                                | 0.00     | 0.00   | 0.00        | 0.00       | 0.00        | 89.96       | 52.37       | 0.00       | 32.24       | 0.00        | 0.00        | 0.00        | 0.00        | 0.00        | 0.00         | 0.00     | 31.36       | 32.88        |
| 15<br>7 | 1647 | γ-butyrolactone                                         | MS/RI     | caramel, fatty                                       | 297.13   | 0.00   | 232.24      | 54.45      | 27.43       | 66.90       | 250.04      | 173.9<br>2 | 130.34      | 0.00        | 152.75      | 125.70      | 0.00        | 266.02      | 279.38       | 0.00     | 219.21      | 180.22       |
| 15<br>8 | 1648 | dehydrolinalool                                         | MS/RI/S/O | mouldy                                               | 12891.50 | 0.00   | 2698.6<br>6 | 126.8<br>4 | 107.79      | 3209.2<br>7 | 5237.5<br>6 | 965.8<br>8 | 2189.7<br>0 | 14954.26    | 27434.87    | 3419.7<br>8 | 11075.60    | 3983.1<br>2 | 8733.97      | 31301.23 | 10376.20    | 28837.4<br>1 |
| 15<br>9 | 1653 | para-tolualdehyde                                       | MS/RI     | fruity, cherry                                       | 0.00     | 0.00   | 0.00        | 0.00       | 36.31       | 0.00        | 130.89      | 19.04      | 348.68      | 3188.4<br>2 | 0.00        | 0.00        | 0.00        | 0.00        | 0.00         | 0.00     | 222.00      | 1702.60      |
| 16<br>0 | 1655 | 4-allylanisole                                          | MS/RI     | licorice, anise                                      | 93.92    | 0.00   | 200.39      | 45.61      | 61.55       | 168.91      | 192.38      | 0.00       | 146.53      | 0.00        | 0.00        | 109.28      | 42.05       | 0.00        | 249.99       | 156.74   | 391.23      | 319.61       |
| 16<br>1 | 1657 | 2,6-octadienoic acid, 3,7-dimethyl-, methyl ester, (Z)- | MS/RI     | floral, herbal, citrus, fruity, green,               | 0.00     | 0.00   | 0.00        | 0.00       | 0.00        | 0.00        | 0.00        | 0.00       | 0.00        | 70.91       | 0.00        | 0.00        | 0.00        | 77.64       | 0.00         | 0.00     | 0.00        | 0.00         |

|          |      |                                           |         |                                                                                               |        |        |             |            |       |             |             |      |             |             |             |              |             |             |         |             |             |              |
|----------|------|-------------------------------------------|---------|-----------------------------------------------------------------------------------------------|--------|--------|-------------|------------|-------|-------------|-------------|------|-------------|-------------|-------------|--------------|-------------|-------------|---------|-------------|-------------|--------------|
| geranium |      |                                           |         |                                                                                               |        |        |             |            |       |             |             |      |             |             |             |              |             |             |         |             |             |              |
| 16<br>2  | 1658 | β-farnesene                               | MS/RI/S | wood, citrus,<br>sweet                                                                        | 48.04  | 0.00   | 0.00        | 0.00       | 0.00  | 154.46      | 0.00        | 0.00 | 210.71      | 7482.4<br>6 | 3022.3<br>2 | 17098.<br>88 | 0.00        | 1132.7<br>9 | 0.00    | 0.00        | 0.00        | 0.00         |
| 16<br>3  | 1659 | furfuryl alcohol                          | MS/RI/S | burnt                                                                                         | 286.23 | 0.00   | 0.00        | 105.7<br>2 | 15.56 | 0.00        | 184.85      | 0.00 | 84.84       | 0.00        | 0.00        | 0.00         | 0.00        | 573.10      | 626.41  | 275.99      | 167.67      | 193.67       |
| 16<br>4  | 1659 | 2-butyl-2-octenal                         | MS/RI/S | green<br>vegetable,<br>leafy<br>cucumber,<br>oily, herbal,<br>fatty,<br>watercress,<br>violet | 0.00   | 0.00   | 0.00        | 0.00       | 0.00  | 0.00        | 253.70      | 0.00 | 0.00        | 514.68      | 55.51       | 0.00         | 0.00        | 0.00        | 429.15  | 2200.5<br>8 | 765.94      | 312.38       |
| 16<br>5  | 1660 | cis-beta-farnesene                        | MS/RI   | citrus, green                                                                                 | 0.00   | 0.00   | 148.86      | 0.00       | 44.99 | 248.94      | 64.25       | 0.00 | 310.36      | 0.00        | 0.00        | 0.00         | 1419.6<br>7 | 0.00        | 478.63  | 1184.9<br>9 | 692.23      | 7288.90      |
| 16<br>6  | 1660 | 6,10-dimethyl-2-undecanone                | MS/RI   | citronella,<br>soapy                                                                          | 0.00   | 0.00   | 42.59       | 0.00       | 0.00  | 0.00        | 157.86      | 0.00 | 0.00        | 1571.0<br>7 | 0.00        | 54.64        | 89.15       | 775.12      | 157.87  | 311.14      | 640.59      | 1160.83      |
| 16<br>7  | 1660 | (E)-2-hexen-1-yl hexanoate                | MS/RI   | apple,<br>pear, kiwi,<br>leafy                                                                | 103.17 | 0.00   | 0.00        | 0.00       | 44.54 | 0.00        | 1481.9<br>5 | 0.00 | 1164.7<br>0 | 8566.1<br>0 | 550.08      | 235.75       | 477.70      | 5612.4<br>0 | 387.50  | 0.00        | 1421.3<br>7 | 12284.1<br>3 |
| 16<br>8  | 1664 | (Z)-3-nonen-1-ol                          | MS/RI/S | green, fat                                                                                    | 0.00   | 130.46 | 600.53      | 0.00       | 27.84 | 932.18      | 367.11      | 0.00 | 707.81      | 0.00        | 0.00        | 0.00         | 1459.8<br>7 | 0.00        | 1005.65 | 3482.8<br>3 | 289.03      | 5318.51      |
| 16<br>9  | 1665 | 3-methylbutanoic acid                     | MS/RI/S | sweat, acid,<br>rancid                                                                        | 0.00   | 0.00   | 0.00        | 0.00       | 0.00  | 0.00        | 0.00        | 0.00 | 0.00        | 180.41      | 0.00        | 0.00         | 0.00        | 0.00        | 1260.27 | 0.00        | 542.62      | 0.00         |
| 17<br>0  | 1666 | L-trans-pinocarveol                       | MS/RI   | woody,<br>balsamic,<br>fennel                                                                 | 0.00   | 0.00   | 0.00        | 0.00       | 0.00  | 105.65      | 0.00        | 0.00 | 0.00        | 0.00        | 0.00        | 0.00         | 0.00        | 0.00        | 224.58  | 0.00        | 1933.8<br>7 | 212.76       |
| 17<br>1  | 1667 | (Z)-3,7-dimethylocta-2,6-dienal           | MS/RI   | lemon                                                                                         | 0.00   | 0.00   | 483.69      | 84.19      | 0.00  | 444.98      | 115.56      | 0.00 | 311.15      | 75.37       | 89.20       | 174.38       | 69.98       | 0.00        | 1386.44 | 6133.1<br>8 | 0.00        | 11609.3<br>0 |
| 17<br>2  | 1668 | nonanol                                   | MS/RI/S | fat, green                                                                                    | 0.00   | 477.91 | 1144.7<br>0 | 151.7<br>6 | 0.00  | 2811.6<br>7 | 897.37      | 0.00 | 1838.1<br>6 | 2251.7<br>9 | 0.00        | 0.00         | 0.00        | 0.00        | 0.00    | 0.00        | 0.00        | 9422.97      |
| 17<br>3  | 1673 | benzyl formate                            | MS/RI   | fresh cherry,<br>with a berry<br>strawberry<br>fruity nuance                                  | 0.00   | 0.00   | 395.02      | 32.16      | 0.00  | 0.00        | 0.00        | 0.00 | 0.00        | 1116.0<br>5 | 0.00        | 0.00         | 0.00        | 867.69      | 0.00    | 0.00        | 0.00        | 0.00         |
| 17<br>4  | 1677 | ketoisophorone                            | MS/RI   | citrus, floral,<br>musty, tea<br>like with<br>green sweet<br>fruity nuances                   | 0.00   | 0.00   | 139.07      | 77.14      | 0.00  | 62.37       | 128.72      | 9.73 | 61.47       | 0.00        | 238.35      | 86.91        | 0.00        | 0.00        | 0.00    | 0.00        | 865.80      | 0.00         |
| 17<br>5  | 1677 | trans-geranic acid methyl ester           | MS/RI   | waxy green<br>fruity flower<br>green, floral,<br>citrus, waxy,                                | 0.00   | 0.00   | 28.83       | 0.00       | 0.00  | 757.61      | 0.00        | 0.00 | 550.96      | 958.57      | 0.00        | 0.00         | 66.14       | 781.50      | 0.00    | 8399.1<br>5 | 1505.7<br>3 | 2487.64      |
| 17<br>6  | 1681 | geranyl formate                           | MS/RI/S | fruity, apple<br>and apricot-<br>like                                                         | 0.00   | 0.00   | 0.00        | 0.00       | 76.98 | 15.01       | 0.00        | 0.00 | 0.00        | 0.00        | 0.00        | 0.00         | 0.00        | 0.00        | 0.00    | 670.62      | 548.61      | 4252.68      |
| 17<br>7  | 1683 | 5-ethenylidihydro-5-methyl-2(3H)-furanone | MS/RI   | fruity, minty                                                                                 | 0.00   | 0.00   | 155.79      | 0.00       | 0.00  | 0.00        | 0.00        | 0.00 | 0.00        | 669.67      | 0.00        | 0.00         | 0.00        | 618.08      | 0.00    | 0.00        | 0.00        | 0.00         |

|         |      |                                  |           |                                                                                |             |        |             |            |        |             |             |            |             |             |        |             |             |             |              |              |             |              |
|---------|------|----------------------------------|-----------|--------------------------------------------------------------------------------|-------------|--------|-------------|------------|--------|-------------|-------------|------------|-------------|-------------|--------|-------------|-------------|-------------|--------------|--------------|-------------|--------------|
| 17<br>8 | 1686 | (E,E)-2,4-nonadienal             | MS/RI/S   | fat, green                                                                     | 0.00        | 0.00   | 71.33       | 0.00       | 0.00   | 0.00        | 0.00        | 0.00       | 0.00        | 0.00        | 0.00   | 0.00        | 0.00        | 1173.6<br>2 | 87.88        | 0.00         | 1203.0<br>8 | 55.20        |
| 17<br>9 | 1688 | $\alpha$ -terpineol              | MS/RI     | pine,<br>terpene,<br>lilac, citrus,<br>woody,<br>floral                        | 3302.5<br>5 | 0.00   | 1899.8<br>8 | 62.46      | 0.00   | 575.39      | 1428.7<br>7 | 173.6<br>0 | 0.00        | 0.00        | 0.00   | 0.00        | 4242.2<br>4 | 2850.8<br>5 | 11439.8<br>2 | 5239.0<br>7  | 0.00        | 4745.69      |
| 18<br>0 | 1694 | $\gamma$ -caprolactone           | MS/RI     | sweet,<br>creamy,<br>tobacco                                                   | 0.00        | 0.00   | 0.00        | 6.95       | 0.00   | 48.26       | 260.55      | 0.00       | 81.02       | 110.78      | 667.95 | 959.46      | 381.00      | 1229.6<br>4 | 128.10       | 216.09       | 370.41      | 1218.36      |
| 18<br>1 | 1696 | propiophenone                    | MS/RI     | fruity                                                                         | 0.00        | 0.00   | 0.00        | 13.07      | 0.00   | 0.00        | 0.00        | 0.00       | 0.00        | 4927.7<br>9 | 204.14 | 163.61      | 0.00        | 5195.4<br>7 | 261.84       | 542.27       | 246.96      | 707.30       |
| 18<br>2 | 1706 | (Z)-3-hexen-1-yl (E)-2-hexenoate | MS/RI     | fruity,<br>herbal,<br>artichoke,<br>tea                                        | 0.00        | 0.00   | 0.00        | 0.00       | 0.00   | 57.01       | 86.41       | 0.00       | 0.00        | 538.43      | 0.00   | 0.00        | 0.00        | 0.00        | 0.00         | 0.00         | 157.82      | 805.36       |
| 18<br>3 | 1710 | (E,E)-2,4-decadienal             | MS/RI     | fat,fried and<br>potato                                                        | 0.00        | 0.00   | 310.22      | 0.00       | 0.00   | 0.00        | 0.00        | 0.00       | 0.00        | 821.95      | 160.59 | 71.12       | 0.00        | 685.83      | 0.00         | 364.92       | 1019.4<br>2 | 0.00         |
| 18<br>4 | 1710 | 2,4-dimethylbenzaldehyde         | MS/RI     | naphthyl,<br>cherry,<br>almond, spice<br>and vanilla                           | 0.00        | 0.00   | 0.00        | 20.02      | 0.00   | 14.98       | 0.00        | 0.00       | 37.32       | 3201.5<br>9 | 273.80 | 0.00        | 0.00        | 165.28      | 1083.58      | 0.00         | 2071.6<br>1 | 3399.89      |
| 18<br>5 | 1714 | benzyl acetate                   | MS/RI     | sweet,<br>floral,<br>fruity,<br>jasmin, fresh                                  | 0.00        | 0.00   | 19.46       | 98.48      | 0.00   | 142.59      | 72.55       | 0.00       | 35.94       | 4045.2<br>7 | 0.00   | 88.22       | 0.00        | 2848.0<br>7 | 1112.95      | 848.46       | 1935.4<br>9 | 1460.76      |
| 18<br>6 | 1714 | $\beta$ -bisabolene              | MS/RI     | balsamic                                                                       | 0.00        | 0.00   | 0.00        | 0.00       | 0.00   | 0.00        | 0.00        | 0.00       | 23.64       | 2141.6<br>2 | 572.98 | 3259.3<br>2 | 260.26      | 0.00        | 52.66        | 69.35        | 69.59       | 1644.32      |
| 18<br>7 | 1715 | (Z)-3-hexen-1-yl (Z)-3-hexenoate | MS/RI/S/O | green,<br>tomato,<br>leaf, pear,<br>melon,<br>metallic,<br>fennel,<br>tropical | 57.32       | 0.00   | 114.50      | 0.00       | 200.07 | 1614.9<br>1 | 1021.4<br>8 | 0.00       | 631.38      | 2334.0<br>9 | 103.92 | 130.27      | 210.63      | 622.47      | 0.00         | 220.30       | 376.82      | 2387.57      |
| 18<br>8 | 1715 | (E)-citral                       | MS/RI/S   | lemon, mint                                                                    | 87.09       | 0.00   | 1337.5<br>2 | 161.0<br>0 | 0.00   | 1634.3<br>1 | 324.36      | 0.00       | 1593.0<br>9 | 2755.4<br>4 | 0.00   | 0.00        | 371.81      | 1637.0<br>7 | 2829.03      | 7687.0<br>2  | 4450.3<br>3 | 18420.4<br>6 |
| 18<br>9 | 1717 | citral                           | MS/RI/S   | lemon                                                                          | 0.00        | 462.55 | 0.00        | 0.00       | 18.91  | 25.30       | 17.57       | 11.74      | 24.94       | 0.00        | 189.01 | 318.50      | 0.00        | 0.00        | 43.63        | 1628.4<br>3  | 0.00        | 0.00         |
| 19<br>0 | 1718 | carvone                          | MS/RI/S   | minty                                                                          | 0.00        | 0.00   | 0.00        | 0.00       | 0.00   | 308.12      | 0.00        | 0.00       | 0.00        | 0.00        | 0.00   | 237.07      | 0.00        | 0.00        | 73.46        | 0.00         | 69.37       | 0.00         |
| 19<br>1 | 1718 | naphthalene                      | MS/RI     | tar                                                                            | 596.90      | 97.13  | 566.20      | 332.9<br>5 | 127.84 | 695.59      | 955.53      | 0.00       | 384.11      | 0.00        | 218.72 | 520.39      | 385.75      | 2442.5<br>2 | 1530.70      | 1346.6<br>5  | 2401.5<br>8 | 0.00         |
| 19<br>2 | 1720 | epoxylinalol                     | MS/RI     | floral, honey                                                                  | 0.00        | 0.00   | 0.00        | 5.57       | 12.73  | 8.50        | 0.00        | 0.00       | 0.00        | 0.00        | 0.00   | 0.00        | 0.00        | 0.00        | 187.01       | 0.00         | 111.68      | 0.00         |
| 19<br>3 | 1722 | dodecanal                        | MS/RI     | soapy, fat,<br>citrus                                                          | 0.00        | 0.00   | 100.01      | 0.00       | 29.33  | 0.00        | 0.00        | 0.00       | 0.00        | 439.78      | 0.00   | 20.87       | 0.00        | 200.27      | 118.49       | 202.74       | 456.15      | 915.91       |
| 19<br>4 | 1722 | 2-thiophenecarboxaldehyde        | MS/RI/S   | sulfurous                                                                      | 0.00        | 0.00   | 0.00        | 0.00       | 0.00   | 0.00        | 110.08      | 26.03      | 0.00        | 0.00        | 0.00   | 0.00        | 0.00        | 577.05      | 0.00         | 552.42       | 0.00        | 0.00         |
| 19<br>5 | 1730 | $\delta$ -cadinene               | MS/RI     | thyme herbal<br>woody dry                                                      | 113.33      | 54.46  | 54.77       | 20.21      | 289.28 | 3052.9<br>8 | 1396.4<br>8 | 201.8<br>3 | 451.07      | 220.40      | 163.43 | 0.00        | 199.22      | 0.00        | 244.88       | 10083.<br>47 | 569.88      | 1853.40      |

|         |      |                                           |           |                                                                             |             |             |             |            |        |              |             |            |             |              |             |             |             |              |              |              |              |               |
|---------|------|-------------------------------------------|-----------|-----------------------------------------------------------------------------|-------------|-------------|-------------|------------|--------|--------------|-------------|------------|-------------|--------------|-------------|-------------|-------------|--------------|--------------|--------------|--------------|---------------|
| 19<br>6 | 1731 | 3,6-(E,Z)-Nonadien-1-ol                   | MS/RI     | fresh green,<br>waxy, melon,<br>with fruity<br>pear notes                   | 0.00        | 0.00        | 0.00        | 0.00       | 0.00   | 119.53       | 0.00        | 0.00       | 0.00        | 0.00         | 25.95       | 0.00        | 194.78      | 0.00         | 161.34       | 1452.2<br>2  | 226.64       | 999.39        |
| 19<br>7 | 1741 | (E)-linalool oxide<br>(pyranoid)          | MS/RI/S/O | woody                                                                       | 487.67      | 438.78      | 369.19      | 67.27      | 202.44 | 4789.1<br>0  | 1671.0<br>2 | 200.7<br>3 | 2457.9<br>1 | 4002.9<br>2  | 2547.1<br>1 | 1095.5<br>3 | 3230.6<br>1 | 1838.3<br>8  | 10543.0<br>9 | 17411.<br>31 | 11017.<br>36 | 21123.3<br>0  |
| 19<br>8 | 1745 | 2(5H)-furanone                            | MS/RI/S   | buttery                                                                     | 62.23       | 0.00        | 0.00        | 0.00       | 0.00   | 0.00         | 0.00        | 0.00       | 0.00        | 0.00         | 0.00        | 0.00        | 0.00        | 0.00         | 130.30       | 0.00         | 0.00         | 0.00          |
| 19<br>9 | 1745 | methyl salicylate                         | MS/RI/S/O | peppermint                                                                  | 1479.3<br>4 | 1144.0<br>3 | 4935.9<br>0 | 175.6<br>1 | 58.60  | 12756.<br>85 | 4690.5<br>0 | 216.9<br>1 | 5352.7<br>5 | 15710.<br>86 | 1276.7<br>6 | 3378.5<br>6 | 8452.2<br>8 | 11085.<br>14 | 30663.3<br>7 | 28228.<br>38 | 18741.<br>17 | 54968.3<br>5  |
| 20<br>0 | 1748 | $\alpha$ -farnesene                       | MS/RI     | citrus herbal                                                               | 0.00        | 0.00        | 55.29       | 0.00       | 0.00   | 33.51        | 0.00        | 0.00       | 67.27       | 2760.6<br>9  | 902.77      | 7090.7<br>4 | 9635.1<br>0 | 0.00         | 171.30       | 226.37       | 0.00         | 3134.49       |
| 20<br>1 | 1749 | methyl 2-phenylacetate                    | MS/RI     | floral, honey,<br>spice, waxy<br>and sweet                                  | 0.00        | 0.00        | 0.00        | 0.00       | 0.00   | 16.27        | 45.18       | 11.08      | 22.27       | 2569.4<br>6  | 99.34       | 39.48       | 0.00        | 3514.3<br>5  | 140.84       | 368.29       | 201.69       | 0.00          |
| 20<br>2 | 1754 | citronellol                               | MS/RI     | floral, citrus                                                              | 0.00        | 0.00        | 0.00        | 30.14      | 0.00   | 0.00         | 0.00        | 0.00       | 0.00        | 0.00         | 0.00        | 0.00        | 0.00        | 0.00         | 520.77       | 794.55       | 0.00         | 16.24         |
| 20<br>3 | 1755 | 2-undecenal                               | MS/RI     | citrus , soapy                                                              | 0.00        | 0.00        | 0.00        | 0.00       | 104.80 | 0.00         | 0.00        | 0.00       | 0.00        | 424.07       | 99.06       | 0.00        | 144.67      | 0.00         | 0.00         | 272.43       | 539.04       | 1212.84       |
| 20<br>4 | 1770 | nerol                                     | MS/RI/S/O | sweet                                                                       | 1575.5<br>6 | 418.41      | 912.23      | 0.00       | 123.65 | 2246.5<br>0  | 229.12      | 105.5<br>3 | 1079.5<br>8 | 1542.8<br>6  | 729.55      | 1318.0<br>2 | 1000.2<br>0 | 5591.3<br>5  | 3293.39      | 7650.8<br>9  | 3479.0<br>2  | 123818.<br>97 |
| 20<br>5 | 1770 | $\gamma$ -heptalactone, 4-<br>heptanolide | MS/RI     | nut, fat, fruit                                                             | 0.00        | 0.00        | 0.00        | 0.00       | 0.00   | 0.00         | 17.23       | 0.00       | 4.15        | 0.00         | 0.00        | 0.00        | 0.00        | 218.42       | 0.00         | 0.00         | 0.00         | 0.00          |
| 20<br>6 | 1771 | benzyl isobutanoate                       | MS/RI     | fruity, sweet,<br>ripe berry                                                | 0.00        | 0.00        | 0.00        | 0.00       | 0.00   | 0.00         | 0.00        | 0.00       | 0.00        | 0.00         | 0.00        | 0.00        | 0.00        | 0.00         | 0.00         | 0.00         | 0.00         | 192.48        |
| 20<br>7 | 1773 | $\alpha$ -curcumene                       | MS/RI     | herb                                                                        | 44.34       | 0.00        | 253.68      | 0.00       | 13.26  | 193.56       | 150.18      | 0.00       | 182.12      | 1846.5<br>4  | 201.38      | 1088.3<br>5 | 288.65      | 919.93       | 318.00       | 401.74       | 787.01       | 708.72        |
| 20<br>8 | 1775 | phenethyl formate                         | MS/RI     | sweet, green,<br>watercress,<br>unripe<br>banana,<br>narcissus,<br>phenolic | 0.00        | 0.00        | 0.00        | 36.84      | 0.00   | 31.66        | 0.00        | 13.47      | 0.00        | 0.00         | 0.00        | 0.00        | 0.00        | 0.00         | 323.36       | 0.00         | 441.19       | 0.00          |
| 20<br>9 | 1776 | 2-phenyl-2-propanol                       | MS/RI     | sweet                                                                       | 82.75       | 0.00        | 0.00        | 36.14      | 0.00   | 1.13         | 23.16       | 0.00       | 133.74      | 0.00         | 0.00        | 0.00        | 0.00        | 0.00         | 0.00         | 0.00         | 0.00         | 0.00          |
| 21<br>0 | 1778 | $\alpha$ -methylphenethyl<br>alcohol      | MS/RI     | sweet,<br>pineapple                                                         | 0.00        | 0.00        | 0.00        | 0.00       | 0.00   | 0.00         | 0.00        | 0.00       | 0.00        | 0.00         | 0.00        | 0.00        | 0.00        | 0.00         | 28.60        | 0.00         | 0.00         |               |
| 21<br>1 | 1782 | $\beta$ -sesquiphellandrene               | MS/RI     | wood                                                                        | 269.70      | 198.31      | 0.00        | 0.00       | 0.00   | 0.00         | 56.29       | 0.00       | 304.25      | 352.32       | 61.15       | 494.03      | 0.00        | 0.00         | 0.00         | 0.00         | 0.00         | 206.93        |
| 21<br>2 | 1784 | (Z)-4-decen-1-ol                          | MS/RI     | waxy, fatty,<br>fruity<br>floral, rose,                                     | 0.00        | 0.00        | 0.00        | 0.00       | 0.00   | 0.00         | 0.00        | 0.00       | 139.20      | 0.00         | 0.00        | 0.00        | 0.00        | 0.00         | 0.00         | 0.00         | 0.00         | 0.00          |
| 21<br>3 | 1791 | phenylethyl acetate                       | MS/RI     | sweet,<br>honey,<br>fruity ,<br>tropical<br>sweet,                          | 144.73      | 0.00        | 0.00        | 21.70      | 8.77   | 93.13        | 0.00        | 0.00       | 43.28       | 4781.1<br>4  | 300.06      | 430.42      | 0.00        | 2693.3<br>3  | 833.26       | 1364.2<br>9  | 931.33       | 2430.18       |
| 21<br>4 | 1794 | 4-acetyltoluene                           | MS/RI     | creamy,<br>fruity, cherry<br>orange,                                        | 0.00        | 0.00        | 0.00        | 0.00       | 0.00   | 0.00         | 0.00        | 0.00       | 0.00        | 0.00         | 0.00        | 0.00        | 0.00        | 0.00         | 68.16        | 0.00         | 0.00         | 506.03        |
| 21<br>5 | 1797 | 2,4-decadienal                            | MS/RI     | sweet,<br>fresh,<br>citrus, fatty                                           | 0.00        | 0.00        | 113.20      | 0.00       | 0.00   | 0.00         | 0.00        | 0.00       | 0.00        | 0.00         | 0.00        | 121.76      | 126.06      | 709.28       | 150.70       | 298.69       | 418.08       | 2074.75       |

|         |      |                                    |           |                                                                      |             |      |             |             |        |             |             |            |             |             |        |             |             |             |         |             |             |              |
|---------|------|------------------------------------|-----------|----------------------------------------------------------------------|-------------|------|-------------|-------------|--------|-------------|-------------|------------|-------------|-------------|--------|-------------|-------------|-------------|---------|-------------|-------------|--------------|
| 21<br>6 | 1803 | hexyl octanoate                    | MS/RI     | green, apple,<br>fruity,<br>berry, fresh                             | 0.00        | 0.00 | 0.00        | 0.00        | 0.00   | 0.00        | 0.00        | 0.00       | 0.00        | 0.00        | 0.00   | 0.00        | 0.00        | 0.00        | 0.00    | 0.00        | 0.00        | 186.53       |
| 21<br>7 | 1804 | methyl laurate                     | MS/RI     | fatty coconut                                                        | 0.00        | 0.00 | 0.00        | 0.00        | 0.00   | 0.00        | 0.00        | 0.00       | 10.51       | 0.00        | 21.08  | 0.00        | 0.00        | 0.00        | 0.00    | 0.00        | 0.00        | 187.34       |
| 21<br>8 | 1807 | (E)-2-dodecenal                    | MS/RI     | fatty, sweet                                                         | 0.00        | 0.00 | 141.50      | 0.00        | 0.00   | 0.00        | 0.00        | 11.44      | 0.00        | 0.00        | 0.00   | 0.00        | 0.00        | 0.00        | 0.00    | 0.00        | 0.00        | 0.00         |
| 21<br>9 | 1811 | (E)-geranyl acetone                | MS/RI     | floral fruity                                                        | 3736.1<br>1 | 0.00 | 0.00        | 0.00        | 306.80 | 1956.6<br>9 | 0.00        | 0.00       | 0.00        | 0.00        | 872.26 | 0.00        | 0.00        | 0.00        | 0.00    | 0.00        | 0.00        | 0.00         |
| 22<br>0 | 1814 | 2-tridecanone                      | MS/RI     | fatty, earthy,<br>dairy, ketonic,<br>cheesy                          | 55.47       | 0.00 | 56.62       | 0.00        | 0.00   | 0.00        | 0.00        | 0.00       | 0.00        | 0.00        | 0.00   | 0.00        | 0.00        | 73.28       | 42.89   | 50.36       | 57.61       | 82.78        |
| 22<br>1 | 1814 | (E)-beta-damascenone               | MS/RI/S/O | apple rose<br>honey tobacco<br>sweet                                 | 311.89      | 0.00 | 0.00        | 0.00        | 0.00   | 0.00        | 47.17       | 13.10      | 0.00        | 1571.6<br>9 | 132.83 | 17.83       | 0.00        | 448.10      | 5627.31 | 2067.9<br>9 | 1427.4<br>1 | 1711.68      |
| 22<br>2 | 1815 | anethole                           | MS/RI     | sweet, anise,<br>licorice,<br>medicinal                              | 0.00        | 0.00 | 371.56      | 27.16       | 33.43  | 0.00        | 326.25      | 61.57      | 228.62      | 0.00        | 0.00   | 86.22       | 0.00        | 0.00        | 0.00    | 223.27      | 0.00        | 0.00         |
| 22<br>3 | 1815 | nerylacetone                       | MS/RI     | fatty, metallic                                                      | 0.00        | 0.00 | 9653.7<br>0 | 1123.<br>30 | 116.88 | 355.44      | 1774.3<br>0 | 211.7<br>8 | 1440.9<br>3 | 0.00        | 0.00   | 2967.3<br>1 | 2335.7<br>7 | 0.00        | 5729.71 | 9621.9<br>2 | 0.00        | 18744.5<br>7 |
| 22<br>4 | 1817 | cis-anethole                       | MS/RI     | sweet anise<br>licorice<br>medicinal<br>chemical,<br>medicinal,      | 0.00        | 0.00 | 0.00        | 0.00        | 0.00   | 0.00        | 0.00        | 0.00       | 0.00        | 0.00        | 65.16  | 0.00        | 0.00        | 0.00        | 0.00    | 0.00        | 0.00        | 0.00         |
| 22<br>5 | 1820 | $\alpha$ -methylbenzyl alcohol     | MS/RI     | with a<br>balsamic<br>vanilla woody<br>nuance                        | 0.00        | 0.00 | 0.00        | 19.85       | 0.00   | 34.57       | 0.00        | 0.00       | 0.00        | 67.97       | 0.00   | 0.00        | 0.00        | 0.00        | 83.83   | 0.00        | 260.78      | 0.00         |
| 22<br>6 | 1822 | undecanol                          | MS/RI     | soapy waxy<br>sweet                                                  | 0.00        | 0.00 | 0.00        | 0.00        | 0.00   | 0.00        | 0.00        | 0.00       | 0.00        | 0.00        | 171.74 | 0.00        | 0.00        | 0.00        | 0.00    | 0.00        | 764.64      | 0.00         |
| 22<br>7 | 1823 | dec-2-en-1-ol                      | MS/RI     | waxy, fresh<br>air, citrus,<br>rose rue<br>fruity,                   | 286.06      | 0.00 | 0.00        | 63.34       | 0.00   | 0.00        | 0.00        | 0.00       | 25.06       | 0.00        | 0.00   | 0.00        | 0.00        | 0.00        | 0.00    | 0.00        | 10.37       | 0.00         |
| 22<br>8 | 1824 | beta-damascone                     | MS/RI/S/O | floral, black<br>currant,<br>plum, rose,<br>honey,<br>tobacco        | 0.00        | 0.00 | 269.16      | 0.00        | 0.00   | 0.00        | 18.18       | 0.00       | 0.00        | 565.43      | 21.84  | 35.46       | 58.11       | 171.80      | 19.98   | 121.41      | 207.36      | 122.31       |
| 22<br>9 | 1824 | tridecanal                         | MS/RI     | flower, sweet                                                        | 0.00        | 0.00 | 0.00        | 0.00        | 0.00   | 0.00        | 0.00        | 0.00       | 0.00        | 0.00        | 57.95  | 0.00        | 0.00        | 0.00        | 0.00    | 0.00        | 0.00        | 0.00         |
| 23<br>0 | 1827 | 6,6-dimethyl-2-norpinene-2-ethanol | MS/RI     | sweet,<br>balsamic,<br>citrus, pine,<br>herbal                       | 0.00        | 0.00 | 0.00        | 0.00        | 0.00   | 0.00        | 0.00        | 0.00       | 0.00        | 81.37       | 0.00   | 0.00        | 0.00        | 0.00        | 0.00    | 0.00        | 0.00        | 0.00         |
| 23<br>1 | 1829 | hexanoic acid                      | MS/RI/S/O | sour fatty                                                           | 94.20       | 0.00 | 158.99      | 0.00        | 0.00   | 282.41      | 240.93      | 0.00       | 77.76       | 6272.4<br>9 | 424.44 | 576.23      | 0.00        | 5150.9<br>1 | 2003.24 | 5589.3<br>2 | 5636.2<br>7 | 0.00         |
| 23<br>2 | 1832 | phenethyl pivalate                 | MS/RI     | balsamic, tea,<br>rose, spicy,<br>geranium,<br>green grassy,<br>waxy | 0.00        | 0.00 | 0.00        | 0.00        | 0.00   | 0.00        | 0.00        | 0.00       | 0.00        | 52.45       | 0.00   | 0.00        | 0.00        | 0.00        | 0.00    | 0.00        | 0.00        | 0.00         |
| 23<br>3 | 1833 | 1-furfuryl pyrrole                 | MS/RI/S/O | vegetative,<br>onion, sharp                                          | 464.52      | 0.00 | 27.34       | 0.00        | 0.00   | 9.09        | 93.79       | 0.00       | 66.09       | 3118.1<br>0 | 29.16  | 17.59       | 0.00        | 2235.6<br>0 | 51.08   | 262.77      | 21.85       | 54.27        |

|         |      |                                                    |           |                                                                  |       |          |         |         |       |          |         |       |          |          |       |        |          |         |          |          |          |        |
|---------|------|----------------------------------------------------|-----------|------------------------------------------------------------------|-------|----------|---------|---------|-------|----------|---------|-------|----------|----------|-------|--------|----------|---------|----------|----------|----------|--------|
|         |      |                                                    |           | and metallic                                                     |       |          |         |         |       |          |         |       |          |          |       |        |          |         |          |          |          |        |
| 23<br>4 | 1838 | (Z)-3-hexen-1-yl octanoate                         | MS/RI     | green, fruity, winey, oily, asparagus, artichoke, metallic       | 0.00  | 0.00     | 0.00    | 0.00    | 22.62 | 74.56    | 56.57   | 0.00  | 114.84   | 0.00     | 0.00  | 65.37  | 0.00     | 80.80   | 0.00     | 0.00     | 0.00     | 556.23 |
| 23<br>5 | 1841 | 4-(2,6,6-Trimethylcyclohexa-1,3-dienyl)butan-2-one | MS/RI     | floral                                                           | 0.00  | 0.00     | 0.00    | 0.00    | 0.00  | 0.00     | 0.00    | 0.00  | 0.00     | 0.00     | 14.64 | 0.00   | 0.00     | 0.00    | 0.00     | 0.00     | 0.00     |        |
| 23<br>6 | 1842 | ionone                                             | MS/RI     | violet sweet floral woody minty, green weedy,                    | 36.14 | 0.00     | 0.00    | 0.00    | 0.00  | 0.00     | 0.00    | 0.00  | 0.00     | 0.00     | 0.00  | 0.00   | 0.00     | 6773.72 | 0.00     | 0.00     | 0.00     |        |
| 23<br>7 | 1846 | carveol                                            | MS/RI     | herbal, plastic, spicy, earthy, mahogany                         | 0.00  | 0.00     | 0.00    | 0.00    | 0.00  | 85.85    | 0.00    | 0.00  | 0.00     | 0.00     | 0.00  | 129.99 | 83.22    | 140.05  | 92.46    | 148.80   | 79.10    |        |
| 23<br>8 | 1850 | 2-hexanoylfuran                                    | MS/RI     | sweet, fruity, green, waxy, beany                                | 0.00  | 0.00     | 0.00    | 0.00    | 0.00  | 0.00     | 15.21   | 0.00  | 0.00     | 0.00     | 0.00  | 0.00   | 0.00     | 0.00    | 0.00     | 0.00     | 0.00     |        |
| 23<br>9 | 1851 | 2-furanacrolein                                    | MS/RI     | green grassy, fruity, spicy, vanilla, nutty, woody, cinnamon     | 0.00  | 0.00     | 0.00    | 0.00    | 0.00  | 0.00     | 0.00    | 0.00  | 0.00     | 262.52   | 0.00  | 0.00   | 0.00     | 297.30  | 0.00     | 0.00     | 0.00     |        |
| 24<br>0 | 1853 | trans-2-Hexenyl n-octanoate                        | MS/RI     | pear                                                             | 0.00  | 0.00     | 0.00    | 0.00    | 0.00  | 0.00     | 0.00    | 0.00  | 0.00     | 0.00     | 0.00  | 0.00   | 0.00     | 20.42   | 0.00     | 0.00     | 0.00     |        |
| 24<br>1 | 1854 | dihydro-β-Ionone                                   | MS/RI     | FLORAL,woody, seedy, berry raspberry, with leafy, spicy nuances  | 90.49 | 0.00     | 0.00    | 8.49    | 0.00  | 0.00     | 0.00    | 0.00  | 19.86    | 0.00     | 25.07 | 0.00   | 0.00     | 291.79  | 325.88   | 460.06   | 438.54   |        |
| 24<br>2 | 1854 | dihydro-α-ionone                                   | MS/RI     | creamy, berry, floral, woody, orris, earthy, violet              | 0.00  | 0.00     | 0.00    | 0.00    | 0.00  | 0.00     | 0.00    | 0.00  | 0.00     | 0.00     | 0.00  | 0.00   | 0.00     | 0.00    | 65.02    | 0.00     | 0.00     |        |
| 24<br>3 | 1855 | 1-methyl-naphthalene                               | MS/RI     | chemical                                                         | 0.00  | 0.00     | 0.00    | 45.73   | 34.80 | 0.00     | 202.07  | 57.90 | 155.44   | 0.00     | 0.00  | 0.00   | 54.82    | 0.00    | 0.00     | 0.00     | 0.00     |        |
| 24<br>4 | 1857 | methyl β-phenylpropionate                          | MS/RI     | honey, fruity, wine, balsam, floral                              | 0.00  | 0.00     | 0.00    | 0.00    | 0.00  | 0.00     | 0.00    | 0.00  | 0.00     | 0.00     | 0.00  | 0.00   | 0.00     | 379.95  | 0.00     | 0.00     | 0.00     |        |
| 24<br>5 | 1860 | geraniol                                           | MS/RI/S/O | floral, rosy, waxy and perfumey with a fruity, peach-like nuance | 0.00  | 11419.54 | 1682.13 | 1458.19 | 0.00  | 33944.61 | 6681.58 | 0.00  | 44227.66 | 13807.54 | 0.00  | 0.00   | 10166.37 | 0.00    | 29200.31 | 55092.42 | 35166.46 |        |



|         |      |                                                       |           |                                                                      |        |             |              |             |        |             |             |       |             |              |        |             |             |              |         |              |              |              |
|---------|------|-------------------------------------------------------|-----------|----------------------------------------------------------------------|--------|-------------|--------------|-------------|--------|-------------|-------------|-------|-------------|--------------|--------|-------------|-------------|--------------|---------|--------------|--------------|--------------|
| 24<br>6 | 1861 | 2', 4'-<br>dimethylacetophenone                       | MS/RI     | floral,<br>woody,<br>sweet,<br>mimosa,<br>minty<br>phenolic,         | 0.00   | 0.00        | 41.75        | 0.00        | 46.45  | 25.61       | 9.07        | 79.30 | 0.00        | 1170.7<br>0  | 31.49  | 0.00        | 0.00        | 58.47        | 35.13   | 0.00         | 0.00         | 0.00         |
| 24<br>7 | 1862 | o-guaiacol                                            | MS/RI     | smoke, spice,<br>vanilla,<br>woody<br>sweet,                         | 0.00   | 0.00        | 0.00         | 38.90       | 0.00   | 0.00        | 0.00        | 0.00  | 0.00        | 27.03        | 0.00   | 0.00        | 0.00        | 0.00         | 0.00    | 23.74        | 40.08        | 0.00         |
| 24<br>8 | 1863 | $\alpha$ -Ionone                                      | MS/RI/S/O | woody, floral,<br>violet, orris,<br>tropical fruity                  | 0.00   | 448.06      | 10464.<br>85 | 0.00        | 0.00   | 6.63        | 1280.7<br>3 | 0.00  | 1117.7<br>9 | 0.00         | 863.36 | 0.00        | 0.00        | 12411.<br>77 | 0.00    | 284.97       | 0.00         | 0.00         |
| 24<br>9 | 1865 | benzyl alcohol                                        | MS/RI/S/O | sweet, flower                                                        | 295.32 | 1763.2<br>0 | 1752.9<br>6  | 1318.<br>86 | 178.61 | 6415.5<br>3 | 1801.2<br>9 | 92.62 | 1387.8<br>7 | 5020.9<br>1  | 980.33 | 1411.9<br>9 | 2080.0<br>8 | 3999.1<br>0  | 8811.32 | 11995.<br>50 | 16682.<br>58 | 20256.2<br>5 |
| 25<br>0 | 1867 | p-acetyethylbenzene                                   | MS/RI     | floral,<br>hawthorn                                                  | 0.00   | 0.00        | 0.00         | 0.00        | 0.00   | 12.03       | 0.00        | 0.00  | 50.10       | 0.00         | 0.00   | 99.58       | 0.00        | 0.00         | 0.00    | 0.00         | 0.00         | 0.00         |
| 25<br>1 | 1877 | 2-methyl-naphthalene                                  | MS/RI     | sweet floral                                                         | 0.00   | 0.00        | 0.00         | 0.00        | 71.36  | 0.00        | 0.00        | 58.94 | 47.11       | 0.00         | 122.54 | 0.00        | 122.98      | 0.00         | 0.00    | 0.00         | 0.00         | 0.00         |
| 25<br>2 | 1877 | Propanoic acid, 2-<br>methyl-, 2-phenylethyl<br>ester | MS/RI     | honey, floral,<br>fruity, tea,<br>rose, peach, pa<br>stry            | 0.00   | 0.00        | 0.00         | 0.00        | 0.00   | 0.00        | 0.00        | 0.00  | 0.00        | 1560.6<br>9  | 676.79 | 615.84      | 56.71       | 593.87       | 0.00    | 0.00         | 0.00         | 0.00         |
| 25<br>3 | 1879 | Furfural acetone                                      | MS/RI     | sweet, nutty,<br>powdery,<br>vanilla,<br>coumarin,<br>creamy         | 0.00   | 0.00        | 0.00         | 0.00        | 0.00   | 0.00        | 0.00        | 0.00  | 0.00        | 53.58        | 0.00   | 0.00        | 0.00        | 0.00         | 0.00    | 0.00         | 0.00         | 0.00         |
| 25<br>4 | 1881 | $\gamma$ -octalactone                                 | MS/RI     | coconut,<br>fatty                                                    | 0.00   | 0.00        | 0.00         | 0.00        | 0.00   | 0.00        | 38.77       | 0.00  | 0.00        | 1021.1<br>2  | 114.07 | 140.38      | 0.00        | 415.47       | 0.00    | 118.96       | 180.67       | 590.01       |
| 25<br>5 | 1885 | dihydropseudoionone                                   | MS/RI     | floral, fruity,<br>tropical,<br>green pear<br>apple banana<br>citrus | 0.00   | 0.00        | 0.00         | 0.00        | 0.00   | 0.00        | 0.00        | 0.00  | 0.00        | 19742.<br>78 | 0.00   | 0.00        | 0.00        | 0.00         | 0.00    | 0.00         | 0.00         | 91.77        |
| 25<br>6 | 1894 | butanoic acid, 3-methyl-,<br>phenylmethyl ester       | MS/RI     | sweet,<br>fruity,<br>apple,<br>pineapple,<br>herbal                  | 0.00   | 0.00        | 0.00         | 0.00        | 0.00   | 0.00        | 0.00        | 0.00  | 0.00        | 518.66       | 0.00   | 38.98       | 0.00        | 0.00         | 0.00    | 0.00         | 277.10       | 0.00         |
| 25<br>7 | 1895 | dimethyl sulfone                                      | MS/RI     | sulfur, burnt                                                        | 0.00   | 0.00        | 0.00         | 0.00        | 0.00   | 0.00        | 0.00        | 0.00  | 0.00        | 0.00         | 0.00   | 0.00        | 0.00        | 76.74        | 10.44   | 0.00         | 0.00         | 0.00         |
| 25<br>8 | 1895 | geranyl isovalerate                                   | MS/RI     | fruit, rose,<br>apple                                                | 0.00   | 0.00        | 0.00         | 0.00        | 0.00   | 0.00        | 0.00        | 0.00  | 0.00        | 0.00         | 0.00   | 0.00        | 0.00        | 0.00         | 0.00    | 274.64       | 0.00         | 0.00         |
| 25<br>9 | 1899 | trans-2-undecen-1-ol                                  | MS/RI     | floral, rose,<br>waxy, fresh<br>fruity                               | 78.09  | 0.00        | 264.60       | 0.00        | 0.00   | 65.86       | 0.00        | 0.00  | 174.06      | 0.00         | 0.00   | 0.00        | 0.00        | 0.00         | 0.00    | 0.00         | 213.85       | 510.58       |
| 26<br>0 | 1907 | benzeneacetaldehyde, $\alpha$ -<br>ethylidene         | MS/RI     | green,<br>vegetative,<br>floral, cocoa<br>and nutty                  | 122.24 | 0.00        | 0.00         | 0.00        | 0.00   | 9.82        | 64.85       | 0.00  | 0.00        | 1715.7<br>6  | 91.83  | 105.96      | 0.00        | 1048.1<br>9  | 3328.15 | 3443.0<br>3  | 1932.2<br>6  | 3774.36      |
| 26<br>1 | 1910 | 2,6-di-tert-butyl-p-<br>methylphenol                  | MS/RI     | mild phenolic<br>camphor                                             | 198.31 | 97.79       | 202.73       | 0.00        | 0.00   | 45.21       | 54.64       | 0.00  | 54.69       | 294.78       | 64.83  | 55.04       | 98.46       | 194.06       | 207.24  | 228.36       | 236.30       | 352.96       |

|         |      |                                               |           |                                                                |             |             |             |             |             |             |             |            |             |              |             |              |             |              |              |              |              |              |
|---------|------|-----------------------------------------------|-----------|----------------------------------------------------------------|-------------|-------------|-------------|-------------|-------------|-------------|-------------|------------|-------------|--------------|-------------|--------------|-------------|--------------|--------------|--------------|--------------|--------------|
| 26<br>2 | 1912 | 2-phenylethanol                               | MS/RI/S/O | floral, sweet,<br>rosey and<br>bready                          | 0.00        | 1387.5<br>5 | 784.84      | 1007.<br>22 | 136.76      | 7477.6<br>9 | 1698.7<br>1 | 181.6<br>2 | 1641.9<br>4 | 11422.<br>80 | 6694.7<br>3 | 16387.<br>96 | 2507.0<br>1 | 3231.5<br>3  | 14786.7<br>8 | 33307.<br>05 | 21157.<br>21 | 30291.3<br>5 |
| 26<br>3 | 1914 | cubebol                                       | MS/RI     | spicy, minty                                                   | 0.00        | 0.00        | 0.00        | 0.00        | 0.00        | 54.58       | 38.42       | 0.00       | 4.33        | 85.56        | 0.00        | 9.47         | 0.00        | 0.00         | 88.17        | 0.00         | 64.79        | 45.59        |
| 26<br>4 | 1916 | α-calacorene                                  | MS/RI     | woody                                                          | 0.00        | 0.00        | 77.27       | 0.00        | 0.00        | 35.40       | 85.38       | 0.00       | 26.79       | 0.00         | 0.00        | 0.00         | 0.00        | 0.00         | 221.82       | 1996.7<br>2  | 262.91       | 773.52       |
| 26<br>5 | 1917 | β-Lonone                                      | MS/RI/S/O | woody, floral,<br>berry, fruity<br>sweet,                      | 4498.0<br>2 | 1596.9<br>0 | 7952.2<br>9 | 1145.<br>08 | 230.55      | 2057.4<br>7 | 5342.2<br>8 | 883.3<br>9 | 1526.9<br>5 | 22400.<br>27 | 3934.0<br>8 | 4941.6<br>1  | 4177.5<br>4 | 14914.<br>45 | 11652.6<br>2 | 14028.<br>20 | 20241.<br>21 | 28705.4<br>6 |
| 26<br>6 | 1920 | benzeneacetaldehyde, α-(2-methylpropylidene)- | MS/RI     | cocoa,<br>nutty, rose,<br>powdery                              | 52.48       | 0.00        | 0.00        | 0.00        | 0.00        | 0.00        | 0.00        | 0.00       | 0.00        | 686.22       | 0.00        | 0.00         | 0.00        | 368.47       | 2205.45      | 2329.5<br>2  | 1119.4<br>1  | 1107.10      |
| 26<br>7 | 1927 | calamenene                                    | MS/RI     | herb, spice                                                    | 0.00        | 32.82       | 0.00        | 0.00        | 147.51      | 1334.4<br>4 | 968.78      | 82.15      | 116.30      | 655.23       | 0.00        | 52.22        | 63.95       | 59.22        | 0.00         | 0.00         | 0.00         | 1246.34      |
| 26<br>8 | 1928 | isoamyl benzoate                              | MS/RI     | sweet, fruity<br>with a green<br>tropical<br>nuance            | 0.00        | 0.00        | 0.00        | 0.00        | 0.00        | 0.00        | 0.00        | 0.00       | 0.00        | 209.05       | 0.00        | 13.90        | 0.00        | 101.22       | 0.00         | 0.00         | 0.00         | 81.12        |
| 26<br>9 | 1936 | 3-Phenyl-1-propanol, acetate                  | MS/RI     | balsamic,<br>floral, fruity,<br>sappy, spicy<br>and cinnamonic | 0.00        | 0.00        | 0.00        | 62.10       | 0.00        | 0.00        | 0.00        | 31.12      | 0.00        | 0.00         | 0.00        | 0.00         | 0.00        | 0.00         | 0.00         | 0.00         | 0.00         | 0.00         |
| 27<br>0 | 1940 | Piperitenone oxide                            | MS/RI     | herbal, minty                                                  | 0.00        | 0.00        | 0.00        | 0.00        | 0.00        | 0.00        | 159.28      | 0.00       | 0.00        | 0.00         | 0.00        | 0.00         | 0.00        | 0.00         | 0.00         | 0.00         | 72.97        | 0.00         |
| 27<br>1 | 1945 | cis-3-hexenoic acid                           | MS/RI     | green grass,<br>sweaty, fruity,<br>cheesy acid                 | 0.00        | 0.00        | 0.00        | 0.00        | 0.00        | 0.00        | 0.00        | 0.00       | 0.00        | 356.32       | 0.00        | 0.00         | 0.00        | 0.00         | 0.00         | 0.00         | 0.00         | 102.87       |
| 27<br>2 | 1955 | heptanoic acid                                | MS/RI/S   | cheesy, fruity,<br>fatty                                       | 0.00        | 0.00        | 35.81       | 0.00        | 0.00        | 0.00        | 25.82       | 0.00       | 0.00        | 689.41       | 0.00        | 32.00        | 0.00        | 687.32       | 278.57       | 267.92       | 722.42       | 831.69       |
| 27<br>3 | 1956 | creosol                                       | MS/RI     | vanilla, spice,<br>woody                                       | 0.00        | 0.00        | 0.00        | 2.45        | 0.00        | 0.00        | 0.00        | 0.00       | 0.00        | 0.00         | 0.00        | 0.00         | 0.00        | 0.00         | 0.00         | 0.00         | 0.00         | 0.00         |
| 27<br>4 | 1956 | benzothiazole                                 | MS/RI     | meaty, beefy<br>and coffee-<br>like                            | 0.00        | 0.00        | 0.00        | 14.11       | 40.32       | 85.67       | 70.34       | 48.39      | 139.53      | 505.16       | 0.00        | 96.23        | 0.00        | 418.41       | 252.86       | 350.09       | 0.00         | 345.38       |
| 27<br>5 | 1958 | 2-phenylethyl butanoate                       | MS/RI     | fruity, floral,<br>green, winey                                | 0.00        | 0.00        | 0.00        | 0.00        | 0.00        | 0.00        | 0.00        | 0.00       | 0.00        | 3563.0<br>6  | 0.00        | 1332.0<br>2  | 165.30      | 82.13        | 243.03       | 468.15       | 314.29       | 2424.03      |
| 27<br>6 | 1967 | beta-ionone epoxide                           | MS/RI     | fruity, sweet,<br>berry, woody,<br>violet, orris,<br>powdery   | 331.78      | 702.61      | 1229.4<br>3 | 190.5<br>6  | 0.00        | 343.20      | 796.35      | 48.12      | 200.13      | 5661.5<br>0  | 869.31      | 1505.3<br>7  | 660.68      | 4101.9<br>7  | 797.89       | 1802.1<br>7  | 4478.2<br>9  | 5327.15      |
| 27<br>7 | 1968 | butanoic acid, 2-methyl-, 2-phenylethyl ester | MS/RI     | fruity, floral,<br>green, sweet,<br>waxy                       | 0.00        | 0.00        | 0.00        | 0.00        | 0.00        | 0.00        | 0.00        | 0.00       | 5.72        | 1929.0<br>9  | 263.10      | 2940.9<br>2  | 95.77       | 0.00         | 0.00         | 0.00         | 0.00         | 1853.92      |
| 27<br>8 | 1971 | 1-(1H-pyrrol-2-yl)-ethanone                   | MS/RI     | sweet, fruity,<br>musty,<br>cherry, nutty,<br>wasabi, tea      | 0.00        | 0.00        | 48.68       | 23.63       | 15.94       | 15.20       | 313.18      | 0.00       | 48.31       | 3943.2<br>0  | 125.62      | 42.31        | 53.32       | 4694.7<br>9  | 907.86       | 1410.9<br>0  | 1661.3<br>9  | 444.49       |
| 27<br>9 | 1971 | β-dihydroionol                                | MS/RI     | woody, floral,<br>amber                                        | 0.00        | 0.00        | 0.00        | 0.00        | 0.00        | 0.00        | 0.00        | 0.00       | 0.00        | 0.00         | 0.00        | 0.00         | 29.61       | 0.00         | 0.00         | 0.00         | 0.00         | 2667.22      |
| 28<br>0 | 1972 | (Z)-jasmone                                   | MS/RI/S/O | woody, bitter,<br>tea, with a<br>citrus and<br>floral nuance   | 0.00        | 441.05      | 0.00        | 372.2<br>0  | 1303.2<br>6 | 2407.0<br>8 | 1141.3<br>5 | 88.03      | 5434.8<br>6 | 3864.0<br>4  | 1069.7<br>0 | 5924.9<br>9  | 792.13      | 834.95       | 805.90       | 615.68       | 733.15       | 14077.4<br>4 |

|         |      |                                         |           |                                                                                     |        |       |             |            |       |        |        |       |             |              |              |              |             |             |         |             |             |              |
|---------|------|-----------------------------------------|-----------|-------------------------------------------------------------------------------------|--------|-------|-------------|------------|-------|--------|--------|-------|-------------|--------------|--------------|--------------|-------------|-------------|---------|-------------|-------------|--------------|
| 28<br>1 | 1972 | dodecanol                               | MS/RI     | fat, soapy                                                                          | 0.00   | 98.99 | 1287.7<br>6 | 0.00       | 0.00  | 0.00   | 0.00   | 0.00  | 0.00        | 0.00         | 0.00         | 0.00         | 0.00        | 0.00        | 0.00    | 0.00        | 0.00        | 0.00         |
| 28<br>2 | 1977 | 2H-pyran-2-one,<br>tetrahydro-6-propyl- | MS/RI     | coconut,<br>sweet,<br>creamy,<br>lactonic and<br>fruity                             | 0.00   | 0.00  | 0.00        | 0.00       | 0.00  | 0.00   | 0.00   | 0.00  | 0.00        | 0.00         | 0.00         | 74.88        | 0.00        | 592.90      | 0.00    | 0.00        | 0.00        | 542.44       |
| 28<br>3 | 1992 | phenol                                  | MS/RI     | phenol,<br>plastic                                                                  | 344.58 | 82.77 | 175.93      | 434.6<br>6 | 0.00  | 80.38  | 99.79  | 40.99 | 103.25      | 772.72       | 124.67       | 196.20       | 129.22      | 970.67      | 312.78  | 448.19      | 874.16      | 596.05       |
| 28<br>4 | 2017 | trans-nerolidol                         | MS/RI/S/O | green, floral,<br>woody, fruity,<br>citrus, melon                                   | 0.00   | 0.00  | 962.32      | 0.00       | 0.00  | 0.00   | 113.08 | 0.00  | 1297.3<br>7 | 37749.<br>31 | 17922.<br>78 | 61834.<br>01 | 9415.4<br>6 | 6509.0<br>0 | 2678.10 | 4064.8<br>8 | 4044.9<br>8 | 31266.3<br>9 |
| 28<br>5 | 2021 | perilla alcohol                         | MS/RI     | woody,<br>cumin, spicy,<br>cardamom,<br>waxy, floral,<br>oily, earthy               | 0.00   | 0.00  | 0.00        | 0.00       | 0.00  | 6.58   | 0.00   | 0.00  | 0.00        | 84.31        | 0.00         | 33.64        | 0.00        | 114.91      | 40.14   | 66.99       | 91.51       | 82.98        |
| 28<br>6 | 2028 | pyrrole-3-<br>carboxaldehyde            | MS/RI     | musty, beefy,<br>coffee                                                             | 151.27 | 0.00  | 0.00        | 0.00       | 0.00  | 0.00   | 0.00   | 0.00  | 0.00        | 2067.3<br>3  | 54.06        | 6.39         | 0.00        | 2717.6<br>7 | 364.08  | 2050.2<br>1 | 373.94      | 310.95       |
| 28<br>7 | 2032 | trans-cinnamaldehyde                    | MS/RI     | sweet, spice,<br>candy,<br>cinnamon,<br>red hots,<br>warm                           | 0.00   | 0.00  | 0.00        | 0.00       | 0.00  | 0.00   | 0.00   | 0.00  | 23.46       | 64.83        | 0.00         | 77.48        | 0.00        | 59.67       | 0.00    | 34.42       | 28.63       | 50.64        |
| 28<br>8 | 2034 | phenylethyl valerate                    | MS/RI     | fruity, rose,<br>leaf                                                               | 0.00   | 0.00  | 0.00        | 0.00       | 0.00  | 27.39  | 23.25  | 0.00  | 0.00        | 0.00         | 0.00         | 0.00         | 0.00        | 399.81      | 105.32  | 0.00        | 193.86      | 293.08       |
| 28<br>9 | 2042 | dihydro-5-pentyl-2(3H)-<br>furanone     | MS/RI     | coconut,<br>peach                                                                   | 36.94  | 0.00  | 0.00        | 12.71      | 0.00  | 36.07  | 38.55  | 0.00  | 0.00        | 1240.6<br>9  | 227.12       | 66.90        | 53.67       | 882.04      | 130.33  | 532.93      | 863.00      | 1194.82      |
| 29<br>0 | 2043 | furaneol                                | MS/RI/S/O | caramel                                                                             | 0.00   | 0.00  | 0.00        | 0.00       | 0.00  | 0.00   | 10.61  | 0.00  | 0.00        | 0.00         | 0.00         | 0.00         | 0.00        | 0.00        | 0.00    | 8.52        | 0.00        | 0.00         |
| 29<br>1 | 2049 | o-methoxybenzoic acid<br>methyl ester   | MS/RI     | herbal, floral,<br>hyacinth,<br>fruity,<br>blackcurrant                             | 0.00   | 0.00  | 0.00        | 0.00       | 0.00  | 5.63   | 0.00   | 0.00  | 0.00        | 0.00         | 0.00         | 18.99        | 0.00        | 10.04       | 0.00    | 0.00        | 72.88       | 45.56        |
| 29<br>2 | 2050 | o-ethylphenol                           | MS/RI     | phenolic                                                                            | 0.00   | 0.00  | 0.00        | 0.00       | 0.00  | 0.00   | 17.11  | 0.00  | 0.00        | 0.00         | 0.00         | 0.00         | 0.00        | 0.00        | 29.31   | 55.44       | 63.02       | 147.72       |
| 29<br>3 | 2050 | nerolidol                               | MS/RI/S   | floral,<br>green,<br>waxy,<br>citrus,<br>woody                                      | 271.10 | 0.00  | 162.53      | 17.30      | 0.00  | 0.00   | 0.00   | 0.00  | 0.00        | 194.36       | 116.27       | 796.51       | 0.00        | 188.51      | 0.00    | 0.00        | 0.00        | 559.86       |
| 29<br>4 | 2052 | 5-methyl-2-phenyl-2-<br>hexenal         | MS/RI     | bitter cocoa,<br>dark<br>chocolate,<br>aldehydic,<br>coffee, nutty,<br>honey, green | 0.00   | 0.00  | 0.00        | 0.00       | 0.00  | 0.00   | 8.64   | 0.00  | 0.00        | 1297.7<br>5  | 0.00         | 0.00         | 0.00        | 176.78      | 1756.03 | 1580.9<br>9 | 1045.2<br>5 | 1065.79      |
| 29<br>5 | 2055 | diphenyl ether                          | MS/RI     | rose, metallic                                                                      | 172.49 | 22.54 | 149.06      | 35.42      | 24.76 | 176.10 | 141.28 | 26.47 | 272.83      | 213.22       | 0.00         | 52.48        | 51.72       | 134.96      | 231.71  | 269.05      | 388.96      | 285.83       |
| 29<br>6 | 2056 | hexyl benzoate                          | MS/RI     | sweet, green,<br>fruity,<br>balsamic,<br>orchid,<br>metallic,                       | 0.00   | 0.00  | 0.00        | 0.00       | 0.00  | 0.00   | 0.00   | 0.00  | 0.00        | 668.39       | 123.29       | 101.59       | 0.00        | 237.94      | 144.01  | 0.00        | 230.65      | 715.02       |

|         |      |                         |       | cilantro                                                                |             |             |        |       |       |        |        |       |        |             |        |             |             |        |         |             |             |         |
|---------|------|-------------------------|-------|-------------------------------------------------------------------------|-------------|-------------|--------|-------|-------|--------|--------|-------|--------|-------------|--------|-------------|-------------|--------|---------|-------------|-------------|---------|
| 29<br>7 | 2057 | benzyl hexanoate        | MS/RI | green, apricot,<br>fruity,<br>gardenia,<br>jasmin                       | 0.00        | 0.00        | 0.00   | 0.00  | 0.00  | 0.00   | 0.00   | 0.00  | 0.00   | 0.00        | 0.00   | 99.05       | 0.00        | 0.00   | 0.00    | 0.00        | 0.00        | 768.44  |
| 29<br>8 | 2058 | cuminic alcohol         | MS/RI | wood, herb                                                              | 0.00        | 0.00        | 0.00   | 0.00  | 0.00  | 0.00   | 0.00   | 0.00  | 0.00   | 170.08      | 0.00   | 61.96       | 152.63      | 0.00   | 30.62   | 259.12      | 271.46      | 301.82  |
| 29<br>9 | 2067 | 4-methylphenol          | MS/RI | medicine,<br>phenol,<br>smoke                                           | 0.00        | 0.00        | 21.05  | 51.15 | 0.00  | 8.49   | 22.65  | 0.00  | 0.00   | 637.26      | 11.51  | 0.00        | 0.00        | 657.38 | 174.51  | 273.58      | 480.09      | 474.29  |
| 30<br>0 | 2083 | octanoic acid           | MS/RI | sweat, cheese                                                           | 0.00        | 0.00        | 0.00   | 0.00  | 0.00  | 0.00   | 8.67   | 0.00  | 0.00   | 1028.1<br>6 | 28.01  | 26.24       | 0.00        | 449.48 | 132.84  | 406.04      | 1020.3<br>8 | 1154.84 |
| 30<br>1 | 2093 | cis-3-hexenyl benzoate  | MS/RI | fatty, floral,<br>green, fruity,<br>spicy, woody                        | 0.00        | 0.00        | 0.00   | 0.00  | 0.00  | 0.00   | 21.16  | 0.00  | 16.05  | 0.00        | 289.79 | 424.87      | 0.00        | 0.00   | 0.00    | 0.00        | 0.00        |         |
| 30<br>2 | 2103 | γ-decalactone           | MS/RI | peach, fat                                                              | 0.00        | 0.00        | 0.00   | 0.00  | 0.00  | 0.00   | 0.00   | 0.00  | 0.00   | 0.00        | 12.27  | 39.65       | 0.00        | 0.00   | 0.00    | 0.00        | 34.24       | 53.70   |
| 30<br>3 | 2106 | cedrol                  | MS/RI | woody,<br>amber, floral,<br>cedar,<br>ambrette,<br>musk                 | 1110.8<br>6 | 1309.4<br>3 | 0.00   | 0.00  | 13.07 | 89.71  | 121.73 | 26.42 | 748.47 | 0.00        | 0.00   | 0.00        | 0.00        | 84.76  | 1867.00 | 0.00        | 3038.8<br>7 | 0.00    |
| 30<br>4 | 2115 | m-cresol                | MS/RI | fecal, plastic                                                          | 0.00        | 0.00        | 0.00   | 42.21 | 0.00  | 6.09   | 0.00   | 23.21 | 0.00   | 0.00        | 0.00   | 0.00        | 100.46      | 0.00   | 0.00    | 0.00        | 0.00        | 0.00    |
| 30<br>5 | 2153 | Thymol                  | MS/RI | phenolic,<br>medicinal,<br>woody, spicy                                 | 0.00        | 36.35       | 0.00   | 0.00  | 0.00  | 223.18 | 3.79   | 0.00  | 0.00   | 160.24      | 19.62  | 383.13      | 0.00        | 0.00   | 92.13   | 823.85      | 153.39      | 0.00    |
| 30<br>6 | 2160 | 2-phenylethyl hexanoate | MS/RI | sweet, waxy,<br>floral, fruity                                          | 0.00        | 0.00        | 0.00   | 0.00  | 0.00  | 0.00   | 0.00   | 0.00  | 0.00   | 172.02      | 0.00   | 447.08      | 0.00        | 0.00   | 0.00    | 0.00        | 0.00        | 0.00    |
| 30<br>7 | 2175 | τ-cadinol               | MS/RI | balsam,<br>earthy                                                       | 0.00        | 0.00        | 0.00   | 0.00  | 0.00  | 59.18  | 0.00   | 14.92 | 0.00   | 0.00        | 62.07  | 0.00        | 0.00        | 0.00   | 181.33  | 883.59      | 298.06      | 0.00    |
| 30<br>8 | 2186 | 4-ethyl-phenol          | MS/RI | phenolic,<br>smoke, bacon<br>and ham                                    | 0.00        | 0.00        | 37.93  | 2.76  | 0.00  | 0.00   | 0.00   | 0.00  | 0.00   | 94.51       | 4.76   | 0.00        | 0.00        | 319.10 | 0.00    | 0.00        | 0.00        | 0.00    |
| 30<br>9 | 2188 | methyl 2-aminobenzoate  | MS/RI | sweet, fruity,<br>concord<br>grape, with a<br>musty and<br>berry nuance | 0.00        | 0.00        | 0.00   | 0.00  | 0.00  | 3.20   | 0.00   | 0.00  | 0.00   | 0.00        | 109.03 | 38.88       | 0.00        | 45.75  | 13.49   | 0.00        | 0.00        | 31.64   |
| 31<br>0 | 2189 | carvacrol               | MS/RI | spicy, herbal,<br>phenolic,<br>medicinal,<br>woody<br>coconut,          | 0.00        | 0.00        | 92.65  | 0.00  | 16.14 | 195.49 | 145.10 | 0.00  | 49.56  | 239.70      | 0.00   | 1097.6<br>6 | 1122.5<br>4 | 104.55 | 330.58  | 396.80      | 71.30       | 303.81  |
| 31<br>1 | 2190 | δ-amylvalerolactone     | MS/RI | creamy, fatty,<br>buttery,<br>milky, nutty,<br>fruity                   | 0.00        | 0.00        | 0.00   | 0.00  | 0.00  | 0.00   | 0.00   | 0.00  | 0.00   | 857.13      | 663.17 | 836.55      | 125.93      | 307.68 | 0.00    | 68.95       | 92.39       | 1228.74 |
| 31<br>2 | 2202 | nonanoic acid           | MS/RI | cheesy, fat                                                             | 96.00       | 0.00        | 134.65 | 0.00  | 0.00  | 38.70  | 39.68  | 0.00  | 17.04  | 1146.2<br>9 | 22.42  | 29.98       | 0.00        | 221.75 | 244.02  | 457.89      | 780.36      | 1214.09 |
| 31<br>3 | 2221 | α-cadinol               | MS/RI | herb, wood                                                              | 0.00        | 23.75       | 0.00   | 0.00  | 0.00  | 38.41  | 45.94  | 30.97 | 21.38  | 120.84      | 288.93 | 60.67       | 0.00        | 0.00   | 346.92  | 2085.3<br>9 | 397.60      | 174.56  |

|         |      |                                                                       |           |                                                                        |      |        |        |            |        |        |        |       |        |              |             |              |              |             |         |             |        |         |
|---------|------|-----------------------------------------------------------------------|-----------|------------------------------------------------------------------------|------|--------|--------|------------|--------|--------|--------|-------|--------|--------------|-------------|--------------|--------------|-------------|---------|-------------|--------|---------|
| 31<br>4 | 2273 | creamy lactone                                                        | MS/RI     | creamy, fatty,<br>coconut,<br>peach and<br>apricot                     | 0.00 | 0.00   | 0.00   | 0.00       | 0.00   | 0.00   | 0.00   | 0.00  | 5.51   | 4541.9<br>0  | 3143.9<br>4 | 12746.<br>83 | 2661.6<br>6  | 1893.8<br>3 | 77.35   | 152.77      | 240.63 | 8009.21 |
| 31<br>5 | 2325 | (2,6,6-trimethyl-2-<br>hydroxycyclohexylidene)<br>acetic acid lactone | MS/RI     | fruity, apricot,<br>woody,<br>mango, berry,<br>cherry, grape           | 0.00 | 237.11 | 521.12 | 80.94      | 0.00   | 73.19  | 165.85 | 0.00  | 56.86  | 0.00         | 0.00        | 0.00         | 0.00         | 0.00        | 570.80  | 0.00        | 0.00   | 0.00    |
| 31<br>6 | 2332 | methyl jasmonate                                                      | MS/RI     | floral,<br>magnolia,<br>fruity, green,<br>jasmin, waxy,<br>kiwi, melon | 0.00 | 0.00   | 0.00   | 0.00       | 0.00   | 0.00   | 0.00   | 0.00  | 18.29  | 0.00         | 0.00        | 449.49       | 174.87       | 0.00        | 0.00    | 0.00        | 0.00   | 231.46  |
| 31<br>7 | 2350 | trans-farnesol                                                        | MS/RI     | floral sweet                                                           | 0.00 | 0.00   | 0.00   | 0.00       | 0.00   | 0.00   | 0.00   | 0.00  | 13.18  | 0.00         | 0.00        | 140.12       | 0.00         | 95.64       | 27.49   | 0.00        | 0.00   | 0.00    |
| 31<br>8 | 2441 | Indole                                                                | MS/RI/S/O | fecal,<br>perfumey                                                     | 0.00 | 613.15 | 544.02 | 651.8<br>5 | 543.97 | 360.50 | 154.50 | 91.95 | 479.00 | 27578.<br>99 | 0.00        | 39547.<br>13 | 19184.<br>91 | 5199.4<br>0 | 1222.19 | 2183.8<br>0 | 939.07 | 3594.80 |
